1           **Hyperglycemia-induced cathepsin L maturation: Linking to**  
2                           **diabetic comorbidities and COVID-19 mortality**

3  
4   Qiong He<sup>1,\*</sup>, Miao-Miao Zhao<sup>1,\*</sup>✉, Ming-Jia Li<sup>1</sup>, Xiao-Ya Li<sup>1</sup>, Jian-Min Jin<sup>2,3</sup>, Ying-Mei  
5   Feng<sup>4</sup>, Li Zhang<sup>5</sup>, Wei-Jin Huang<sup>5</sup>, Fang-Yuan Yang<sup>1</sup>, and Jin-Kui Yang<sup>1</sup>✉

6  
7   <sup>1</sup>Department of Endocrinology, Beijing Diabetes Institute, Beijing Tongren Hospital, Capital Medical  
8   University, Beijing, China

9   <sup>2</sup>Department of Respiratory and Critical Care Medicine, Beijing Tongren Hospital, Capital Medical  
10   University, Beijing, China

11   <sup>3</sup>Department of Internal Medicine, Union Hospital, Tongji Medical College, Huazhong University of  
12   Science and Technology, Wuhan 430022, China.

13   <sup>4</sup>Department of Science and Technology, Beijing Youan Hospital, Capital Medical University, Beijing,  
14   China

15   <sup>5</sup>Division of HIV/AIDS and Sex-Transmitted Virus Vaccines, Institute for Biological Product Control,  
16   National Institutes for Food and Drug Control (NIFDC), Beijing, China

17

18   \*These authors contributed equally.

19   ✉Correspondence to Jin-Kui Yang ([jk yang@ccmu.edu.cn](mailto:jk yang@ccmu.edu.cn)) or Miao-Miao Zhao ([mmzhao@ccmu.edu.cn](mailto:mmzhao@ccmu.edu.cn)).

20

## 1 **ABSTRACT**

2 Diabetes, a prevalent chronic condition, significantly increases the risk of mortality from  
3 COVID-19, yet the underlying mechanisms remain elusive. Emerging evidence implicates  
4 Cathepsin L (CTSL) in diabetic complications, including nephropathy and retinopathy. Our  
5 previous research identified CTSL as a pivotal protease promoting SARS-CoV-2 infection.  
6 Here, we demonstrate elevated blood CTSL levels in individuals with diabetes, facilitating  
7 SARS-CoV-2 infection. Chronic hyperglycemia correlates positively with CTSL  
8 concentration and activity in diabetic patients, while acute hyperglycemia augments CTSL  
9 activity in healthy individuals. *In vitro* studies reveal high glucose, but not insulin, promotes  
10 SARS-CoV-2 infection in wild-type cells, with *CTSL* knockout cells displaying reduced  
11 susceptibility. Utilizing lung tissue samples from diabetic and non-diabetic patients,  
12 alongside db/db diabetic and control mice, we illustrate increased CTSL activity in both  
13 humans and mice under diabetic conditions. Mechanistically, high glucose levels promote  
14 CTSL maturation and translocation from the endoplasmic reticulum to the lysosome via the  
15 ER-Golgi-lysosome axis. Our findings underscore the pivotal role of hyperglycemia-induced  
16 CTSL maturation in diabetic comorbidities and complications.

## 1 **Introduction**

2 Cysteine proteases, including cathepsin L (CTSL), hold pivotal roles in human pathobiology  
3 due to their multifaceted activities within and outside cells. Emerging evidence links  
4 cathepsins, notably CTSL, to metabolic disorders like obesity and diabetes, as well as  
5 diabetic complications (Crawford *et al*, 2022; Ding *et al*, 2020; Limonte *et al*, 2022).  
6 Previous studies have associated CTSL with proteinuria in podocytes (Reiser *et al*, 2004)  
7 and intraocular angiogenesis (Shimada *et al*, 2010), suggesting its potential as a therapeutic  
8 target for diabetic nephropathy and vision-threatening conditions such as proliferative  
9 diabetic retinopathy (Shimada *et al.*, 2010).

10 Recent investigations highlight CTSL's involvement in the cleavage and processing of the  
11 SARS-CoV-2 spike protein, critical for viral entry and replication within host cells, as  
12 reported by our group (Zhao *et al*, 2021b) and others (Jackson *et al*, 2022; Muralidar *et al*,  
13 2021). Our previous studies show that elevated CTSL levels correlate with disease severity  
14 and CTSL is crucial for activation of all emerging SARS-CoV-2 variants, making it a  
15 potential drug target for future mutation-resistant therapy (Zhao *et al.*, 2021b; Zhao *et al*,  
16 2022). However, the specific role of CTSL in COVID-19 infection among diabetic patients  
17 remains unexplored.

18 Patients with diabetes face heightened risks of severe COVID-19 outcomes and increased  
19 mortality rates (Khunti *et al*, 2021). Studies report a 1.23 to 5.87 times higher likelihood of  
20 severe COVID-19 and death among diabetic individuals compared to non-diabetic  
21 counterparts (Dennis *et al*, 2021; Shi *et al*, 2020; Williamson *et al*, 2020). Diabetes ranks as  
22 the second most prevalent chronic comorbidity contributing to COVID-19 fatalities,  
23 following hypertension, according to data from the American Centers for Disease Control  
24 and Prevention (CDC). Notably, within the diabetic cohort, individuals with elevated blood  
25 glucose levels ( $\text{HbA1c} \geq 7.5\%$ ) exhibit a higher hazard ratio for adverse outcomes compared

1 to those with lower glucose levels (HbA1c < 7.5%) (Williamson *et al.*, 2020).

2 This study delves into the impact of high glucose levels on CTSL maturation and its  
3 implications for diabetic comorbidities, complications, and susceptibility to SARS-CoV-2  
4 infection. Our findings unveil the role of high glucose in promoting CTSL maturation and  
5 translocation from the endoplasmic reticulum to the lysosome, potentially exacerbating  
6 diabetic complications and contributing to COVID-19 susceptibility among diabetic  
7 individuals.

8

## 9 **Results**

### 10 **Diabetic COVID-19 patients have severe conditions and elevated CTSL**

11 In COVID-19 patients, we conducted a case-control study to examine the association of  
12 diabetes and COVID-19 severity in 207 COVID-19 inpatients from two hospitals. We  
13 matched 62 patients by gender and age, 31 with diabetes and 31 without (Fig. 1a).  
14 [Supplementary Table 1](#) summarizes the demographic and clinical characteristics of these  
15 diabetic and non-diabetic COVID-19 patients. We found that diabetic patients had a  
16 significantly higher risk of developing severe COVID-19 than non-diabetic patients  
17 according to the clinical classification criteria (<http://www.nhc.gov.cn/>), and had more  
18 symptoms such as fever, cough, fatigue, and dyspnea (Fig. 1b). Diabetic COVID-19 patients  
19 showed higher levels of inflammation and infection markers ([Supplementary Table 1](#)). These  
20 results suggest that diabetes is strongly associated with severity of COVID-19.

21 To explore the mechanisms of hyperglycemia and SARS-CoV-2 infection, we collected  
22 plasma samples from Beijing Youan Hospital on Day 0 (the admission day), Day 14, and  
23 Day 28 after discharge from the hospital (Fig. 1c). SARS-CoV-2 infects host cells through  
24 the virus spike protein binding with ACE2 receptor. It uses host proteases, such as CTSL and  
25 cathepsin B (CTSB) to activate its spike protein by cleavage, which enhances its cell entry

1 (Jackson *et al.*, 2022; Muralidar *et al.*, 2021). We measured the plasma levels of COVID-19  
2 related proteins, ACE2, CTSL, and CTSB in diabetic and non-diabetic COVID-19 patients.  
3 Only CTSL levels were significantly higher in diabetic patients than in non-diabetic patients  
4 and changed with the course of COVID-19. CTSL peaked on admission day and decreased  
5 significantly after discharge from the hospital (Fig. 1d-f). These results indicate that CTSL is  
6 strongly associated with COVID-19, as previously reported (Zhao *et al.*, 2022), and may be  
7 involved in diabetes in COVID-19 patients.

8

### 9 **Impact of chronic and acute hyperglycemia on CTSL activity**

10 In non-COVID-19 participants, we investigated the correlation of CTSL with chronic and  
11 acute hyperglycemia using two studies. First, to examine the impact of chronic  
12 hyperglycemia on CTSL, we performed a case-control study in 61 patients with type 2  
13 diabetes and 61 euglycemic subjects, matched for sex and age (Supplementary Table 2). We  
14 found that plasma CTSL activity was strongly positively correlated with chronic  
15 hyperglycemia indicated by HbA1c, and was significantly higher in diabetic patients than in  
16 euglycemic individuals (Fig. 2a, c). Additionally, plasma CTSL concentration showed a  
17 positive trend with chronic hyperglycemia indicated by HbA1c (Fig. 2b, d). Second, to  
18 examine the impact of acute hyperglycemia on CTSL, we performed a hyperglycemic clamp  
19 study in 15 healthy male subjects (Fig. 2e-g). We observed that CTSL activity increased  
20 parallelly with blood glucose levels (Fig. 2h, i). However, CTSL concentration did not  
21 change with blood glucose levels (Fig. 2j). Therefore, chronic hyperglycemia is strongly  
22 associated with both CTSL concentration and activity, while acute hyperglycemia only  
23 affects CTSL activity.

24 We also observed a strongly correlation between CTSL activity/concentration and other  
25 chronic comorbidities like hypertensin and coronary heart disease (CHD), except for

1 diabetes (Supplementary Table 3). Additionally, elevated blood glucose levels also  
2 accompanied with an increase in insulin and proinsulin C-peptide levels in acute  
3 hyperglycemic individuals (Fig. 2f, g) and diabetic patients (insulin resistance) (Gerich,  
4 2003). It is unclear whether the increased CTSL activity/concentration is solely a result of  
5 hyperglycemia or the corresponding hyperinsulinemia, and further clarification is needed.

6

## 7 **Hyperglycemia enhances SARS-CoV-2 infection through CTSL**

8 To validate our hypothesis that diabetic patients are more susceptible to SARS-CoV-2  
9 infection results from higher CTSL levels, we conducted *in vitro* experiments using a  
10 SARS-CoV-2 pseudovirus system, which indicates the virus invasion rate instead of  
11 replication, and utilized the SARS-CoV-2 susceptible human hepatoma cell line Huh7, given  
12 that the liver is a primary target of SARS-CoV-2 (Gupta *et al*, 2020).

13 First, to examine if cells cultured with serum from diabetic patients are more susceptible  
14 to SARS-CoV-2 infection, we compared the infectivity of cells cultured with healthy and  
15 diabetic sera exposed to SARS-CoV-2 using a luciferase assay. The results showed that cells  
16 cultured with diabetic serum had higher infection rate than cultured with healthy serum (Fig.  
17 3a), indicating diabetic serum facilitated SARS-CoV-2 entry into host cells.

18 Next, we investigated whether elevated blood glucose or insulin level promoted  
19 SARS-CoV-2 infection by culturing Huh7 cells in cell media with various concentrations of  
20 glucose or insulin. Consistent with our clinical data, the results showed that infection was  
21 more severe in Huh7 cells at high glucose levels, while insulin levels had a minimal impact  
22 on SARS-CoV-2 infection (Fig. 3b, c).

23 Given that hyperglycemia increased CTSL levels (Fig. 2) and facilitated SARS-CoV-2  
24 entry into host cells (Fig. 3b), we hypothesized that high blood glucose promoted  
25 SARS-CoV-2 infection through CTSL. To investigate the requirement of CTSL in

1 SARS-CoV-2 infection, we used the CRISPR-Cas9 system to establish a stable *CTSL*  
2 knockout (KO) Huh7 cell line. The knockout efficiency of *CTSL* protein of *CTSL* KO Huh7  
3 cell line was confirmed in Fig. 3d. Compared with wild-type (WT) cells, knockout of *CTSL*  
4 led to a significant reduction in SARS-CoV-2 infection (Fig. 3e), suggesting that *CTSL* is  
5 crucial for SARS-CoV-2 infection as we previously reported (Zhao *et al.*, 2022).

6 We then conducted a *CTSL* KO Huh7 cell infection experiment under different glucose  
7 conditions, to illustrate the impact of glucose level on SARS-CoV-2 infection via *CTSL*. The  
8 results showed that WT Huh7 cell cultured in high glucose medium exhibited a much higher  
9 infective rate than those in low glucose medium. However, *CTSL* KO Huh7 cells maintained  
10 a low infective rate of SARS-CoV-2 regardless of glucose or insulin levels (Fig. 3f-h).  
11 Therefore, hyperglycemia enhanced SARS-CoV-2 infection through *CTSL*. Considering that  
12 *CTSL* realizes its proteolytic function through its enzyme activity and protein concentration,  
13 subsequent studies aimed to reveal whether the *CTSL* activity or concentration changed  
14 under high glucose condition.

15

## 16 **Elevation of glucose level boosts *CTSL* activity**

17 Hyperglycemia can lead to metabolic acidosis and alter blood pH. However, the normal  
18 range for blood pH in humans is relatively narrow, typically ranging from 7.35 to 7.45. In  
19 our study, blood pH remained within this normal range for both diabetic and healthy control  
20 samples. Fig. 4a demonstrates consistent *CTSL* activity despite pH variations. Then we  
21 conducted a series of experiments to investigate the impact of hyperglycemia on *CTSL*  
22 activity. Our findings showed that elevated glucose levels significantly stimulated both  
23 intracellular and extracellular *CTSL* activity in a dose-dependent manner in Huh7 cells (Fig.  
24 4b, c), which was consistent with our clinical data (Fig. 2a, h). In contrast, insulin levels had  
25 no effect on *CTSL* activity in Huh7 cells (Fig. 4d, e), indicating that it was hyperglycemia,

1 rather than hyperinsulinemia, that boosted CTSL activity in diabetic patients.

2 We then evaluated CTSL activity in human and mouse biopsy tissues under high blood  
3 glucose condition. The demographic and clinical information for the human lung tissue  
4 samples donors in this study can be found in [Supplementary Table 4](#). Diabetic mice (db/db  
5 mice) had significantly increased glucose, body weight and fasting insulin levels compared  
6 to control (db/m mice) group ([Fig. 4f-h](#)). We observed an elevation of CTSL activity in both  
7 diabetic mice and human lung tissues ([Fig. 4i, j](#)), suggesting that high glucose condition may  
8 increase CTSL activity in the respiratory system in diabetic patients and mice *in vivo*. The  
9 increase of CTSL activity in diabetic mice liver tissue ([Fig. 4i](#)) was consistent with the  
10 results of Huh7 hepatocytes ([Fig. 4b](#)).

11

## 12 **High glucose level stimulates CTSL maturation**

13 To investigate the impact of high blood glucose on CTSL expression, we first measured the  
14 mRNA levels of CTSL under different glucose concentrations using D-glucose and  
15 L-glucose ([Supplementary Fig. 1](#)). While D-glucose is commonly used as a major energy  
16 source, L-glucose cannot be absorbed by cells but has similar physical properties to  
17 D-glucose, making it an ideal control. Surprisingly, our results showed that glucose or  
18 insulin levels did not affect CTSL mRNA levels in Huh7 cells, mouse tissues or human  
19 tissues ([Supplementary Fig. 1](#)), indicating that glucose did not influence CTSL transcription.

20 CTSL undergoes several forms during its translation and post-translational maturation  
21 process. The immature pro-cathepsin L ([proCTSL](#), 39 kDa) possesses an N-terminal  
22 proregion, which acts as an autoinhibitor. The protein is translocated through the  
23 endoplasmic reticulum (ER)-Golgi apparatus-lysosome axis, and the proregion is removed  
24 in the acidic environment in lysosome results in either single chain mature cathepsin L  
25 ([sc-mCTSL](#), 31 kDa) or double chain mature cathepsin L ([dc-mCTSL](#), 24 kDa) ([Fig. 5a](#))



1 (Coutinho *et al*, 2012; Ishidoh & Kominami, 2002; Reiser *et al*, 2010). Only mature CTSL  
2 in lysosome has catalytic activity against specific substrates, while proCTSL does not  
3 (Ishidoh & Kominami, 2002).

4 Interestingly, we found that high glucose levels promoted CTSL maturation, whereas  
5 insulin had no effect on this process, as shown in Fig. 5b. Our results indicated that high  
6 D-glucose levels reduced proCTSL and increased sc-mCTSL and dc-mCTSL in a glucose  
7 dose-dependent manner (Fig. 5b, Supplementary Fig. 2). The results also confirmed that  
8 only D-glucose induced CTSL maturation from proCTSL to mCTSL, while L-glucose had  
9 no such effects (Fig. 5b, c). Similar effects of high glucose on CTSL maturation were also  
10 observed in diabetic mice and human tissues compared with their healthy counterparts (Fig.  
11 5d, e). The differences observed in the processing of CTSL between cells (Fig. 5b) and  
12 tissues (Fig. 5d-e) may be attributed to the complexities inherent in tissue samples, which  
13 can impact the clarity of the images. Furthermore, in human tissue samples, it is pertinent to  
14 consider that patients in the diabetes group had their blood glucose levels controlled within  
15 or near the normal range prior to lung surgery. As a result, the evidence supporting CTSL  
16 maturation in human lung tissue blotting images may be less compelling. These results  
17 suggested that hyperglycemia rather than hyperinsulinemia or other physical parameters  
18 associated with CTSL maturation. This was consistent with our previous data that elevated  
19 glucose levels enhanced CTSL activity (Fig. 4b), since only mature CTSL has enzymatic  
20 activity.

21

## 22 **High glucose facilitates CTSL maturation via translocation**

23 We have shown that high glucose promoted CTSL maturation by converting proCTSL into  
24 mCTSL (Fig. 5, Supplementary Fig. 2). However, the mechanism underlying this process  
25 remained unclear. As mentioned previously, CTSL maturation depends on structural

1 activation via the ER-Golgi apparatus-lysosome axis and acid activation at low pH  
2 environment (Fig. 6a) (Ishidoh & Kominami, 2002; Reiser *et al.*, 2010). Only the CTSL in  
3 lysosome is processed into mature form and has proteolytic activity, while the CTSL in the  
4 ER or Golgi apparatus is immature and does not have enzymatic activity. Based on this, we  
5 hypothesized that high blood glucose may drive CTSL maturation via the ER-Golgi  
6 apparatus-lysosome axis. We labeled specific proteins in each organelle: calreticulin for ER,  
7 GM130 for Golgi apparatus and lamp1 for lysosome (Supplementary Fig. 3). We also  
8 confirmed CTSL expression in Huh7 cells (Supplementary Fig. 4). Confocal microscopy  
9 results revealed that under low glucose conditions, CTSL tended to co-localize within the  
10 ER rather than lysosomes (Fig. 6b, e). This finding suggests that CTSL primarily existed in  
11 an immature form under low glucose conditions. As glucose level increased, CTSL in the  
12 Golgi apparatus remained unchanged (Fig. 6c, f), while co-localized largely increased in the  
13 lysosomes (Fig. 6d, g), suggesting CTSL predominantly existed in mature form under high  
14 glucose conditions. Therefore, we concluded that high glucose facilitated CTSL  
15 translocation through the ER-Golgi apparatus-lysosome axis.

16

## 17 **Discussion**

18 Almost immediately after the SARS-CoV-2 emerged, it became apparent that individuals  
19 with chronic conditions, including diabetes, were disproportionately affected, with a  
20 heightened risk of hospitalization and mortality (Williamson *et al.*, 2020). Diabetes may  
21 increase susceptibility to severe SARS-CoV-2 infections for various suggested reasons.  
22 These include higher viral titer, relatively low functioning T lymphocytes that lead to  
23 decreased viral clearance, vulnerability to hyperinflammation and cytokine storm syndrome,  
24 and comorbidities associated with type 2 diabetes, such as cardiovascular disease,  
25 non-alcoholic fatty liver disease, hypertension, and obesity (Mazucanti & Egan, 2020;

1 Moradi-Marjaneh *et al*, 2021). Additionally, other risk factors that may contribute to the  
2 severity of infection include increased expression of angiotensin-converting enzyme 2  
3 (ACE2) (Rao *et al*, 2020) and furin (Fernandez *et al*, 2018). However, most current studies  
4 on COVID-19 and diabetes focus on epidemiological evidence and biomarker features, but  
5 few investigate the causal link and underlying mechanisms of how hyperglycemia enhances  
6 SARS-CoV-2 infection, confirmed by human body fluids, biopsies, and animal models. The  
7 underlying mechanisms by which diabetes or hyperglycemia exacerbates COVID-19 remain  
8 to be fully elucidated.

9 This study identified that CTSL maturation induced by hyperglycemia may contribute to  
10 the higher mortality and severity of COVID-19 in patients with diabetes. While our initial  
11 study involved 62 COVID-19 patients, with 31 having diabetes and 31 without, matching  
12 based on gender and age, we acknowledged the challenge of obtaining balanced gender  
13 distribution in both groups due to the difficulty of collecting blood samples from COVID-19  
14 patients. To mitigate potential gender bias resulting from small sample sizes, we conducted a  
15 supplementary clinical study involving 122 non-COVID-19 volunteers, including 61  
16 individuals with diabetes and 61 without. The percentage of males in the diabetes group was  
17 50.8%, while in the healthy group, males constituted 44.3% ( $P$  value = 0.468), indicating no  
18 significant gender bias. The clinical data from this study indicated that human plasma CTSL  
19 activity and concentration were correlated with acute (in euglycemic participants under high  
20 glucose clamp conditions) and chronic (in diabetic patients, both with and without  
21 COVID-19) hyperglycemia, respectively.

22 Using lung tissue samples from diabetic and non-diabetic patients, as well as db/db  
23 diabetic and control mice, we found that diabetic conditions increased CTSL activity in both  
24 humans and mice. The liver is a significant target organ for COVID-19 (Gupta *et al.*, 2020).  
25 Despite potential limitations, such as generalization of liver function abnormalities and lack

1 of tissue specificity in SARS-CoV-2 impact, Huh7 cells offer practical advantages as a  
2 mature cell model for studying SARS-CoV-2 infection, including accessibility, susceptibility  
3 to infection, and stable proliferation (Nie *et al*, 2021) (Ciotti *et al*, 2020). Taking all these  
4 factors into consideration, we have ultimately chosen to utilize the hepatoma cell line to  
5 investigate how hyperglycemia induces CTSL maturation and subsequently promotes  
6 SARS-CoV-2 infection. High glucose promoted SARS-CoV-2 infection in WT cells, while  
7 CTSL KO cells showed reduced susceptibility to high glucose promoting effects.  
8 Mechanistically, we proposed that hyperglycemia promoted CTSL maturation by  
9 accelerating its translocation from the ER to lysosome via Golgi apparatus. This condition  
10 increased the functionality of CTSL, which cleaved the spike protein of SARS-CoV-2,  
11 promoting virus membrane fusion and infection (Fig. 6h). In our study, the term “diabetes”  
12 encompasses the condition of hyperglycemia in a broad sense, rather than specifically  
13 indicating type 1 diabetes (T1DM) or type 2 diabetes (T2DM). This broader definition aligns  
14 with the scope of our research objectives and findings, particularly observed in the cell  
15 experiments conducted.

16 Fig. 2h-j illustrate the impact of acute hyperglycemia on CTSL concentration and activity  
17 in 15 healthy male volunteers over a 160-minute period. During this short timeframe, CTSL  
18 concentration remained stable, as evidenced by consistent RNA results from cells exposed to  
19 varying glucose levels (Supplementary Fig.1). However, there was a significant increase in  
20 CTSL activity, indicating that glucose elevation rapidly triggers CTSL maturation through  
21 propeptide cleavage. This activation process occurs more rapidly than CTSL protein  
22 synthesis. In summary, acute hyperglycemia specifically elevates CTSL activity, while  
23 chronic hyperglycemia may impact both CTSL activity and concentration (Fig. 2a-d). To  
24 date, there have been limited studies investigating the relationship between cathepsin  
25 maturation and glucose. In 1998, Tournu C, et al. reported that D-glucose did not impact

1 mRNA levels for CTSB or CTSL or secretion of proCTSL. However, D-glucose did  
2 significantly enhance the amount of mature forms of CTSB and CTSL (Tournu *et al*, 1998).  
3 More recently, Shi Q, et al. found that increased glucose metabolism promotes  
4 O-GlcNAcylation of the lysosome-encapsulated protease CTSB, leading to elevated levels  
5 of mature CTSB in macrophages and secretion in the tumor microenvironment (Shi *et al*,  
6 2022). These findings support our evidence that hyperglycemia drives CTSL maturation.

7 ACE2 has previously been identified as a critical host cell surface receptor that enables  
8 SARS-CoV-2 entry into host cells (Wrapp *et al*, 2020). While some studies have reported  
9 that glucose can increase ACE2 expression in cell lines (Hardtner *et al*, 2013), numerous  
10 other studies have found that ACE2 is downregulated in diabetic patients (Mizuiru *et al*,  
11 2008; Reich *et al*, 2008). Garreta et al. recently conducted a study using a human kidney  
12 organoid system to investigate the impact of diabetes on SARS-CoV-2 infections. The study  
13 revealed that hyperglycemia enhanced SARS-CoV-2 infection and hyperglycemic human  
14 kidney organoids had elevated ACE2 levels (Garreta *et al*, 2022). Therefore, it remains  
15 controversial whether diabetes results in up- or downregulation of ACE2. In our study, we  
16 evaluated plasma levels of ACE2, CTSL, and CTSB in COVID-19 patients with and without  
17 diabetes. We found that only CTSL levels were significantly increased in diabetic patients  
18 compared to non-diabetic patients and varied during the course of COVID-19.

19 In addition to CTSL, there may be other bioactive factors involved in mediating  
20 SARS-CoV-2 infection in patients with diabetes. A recent study revealed that diabetic  
21 patients have lower levels of serum 1,5-anhydro-D-glucitol (1,5-AG), a small-molecule  
22 metabolite in human blood that exhibits potent antiviral activity against SARS-CoV-2. The  
23 reduced levels of 1,5-AG have been associated with increased viral loads and severe  
24 respiratory tissue damage caused by SARS-CoV-2. Mechanistically, the study found that  
25 1,5-AG binds directly to the S2 subunit of the spike protein, which disrupts virus-host

1 membrane fusion and inhibits infection (Tong *et al*, 2022). Therefore, we propose that  
2 diabetes may promote COVID-19 infection through multiple factors, and CTSL is only one  
3 of several important factors.

4 Apart from diabetes, other comorbidities such as hypertension and CHD are also  
5 prevalent in COVID-19 patients. Interestingly, our study revealed a strong correlation  
6 between CTSL activity and concentration with hypertension and CHD in these patients.  
7 Using an angiotensin II-induced hypertension model, researchers observed an increase in  
8 blood pressure and CTSL activity (Lu *et al*, 2020). Whether these chronic comorbidities  
9 contribute to increased morbidity and mortality of COVID-19 by increasing CTSL activity  
10 and concentration requires further investigation in the future.

11 In conclusion, our study demonstrates that hyperglycemia drives the maturation and  
12 activation of CTSL, for only mature form of CTSL gains its function of proteolysis.  
13 Therefore, targeting CTSL may be a promising therapeutic strategy for diabetic  
14 comorbidities and complications(Hua Li, 2022).

15

## 16 **Materials and methods**

### 17 **Key resources table**

| <b>Reagent type (species) or resource</b> | <b>Designation</b> | <b>Source or reference</b>               | <b>Identifiers</b> |
|-------------------------------------------|--------------------|------------------------------------------|--------------------|
| animal (mice)                             | db/db mice         | Vital River Laboratories                 | N/A                |
| animal (mice)                             | db/m mice          | Vital River Laboratories                 | N/A                |
| cell line (Homo sapiens, liver)           | The Huh7 cell line | Cell Resource Center, Chinese Academy of | N/A                |

|                           |                                                |                                                                                                                         |                            |
|---------------------------|------------------------------------------------|-------------------------------------------------------------------------------------------------------------------------|----------------------------|
|                           |                                                | Medical Sciences                                                                                                        |                            |
| biological sample (human) | Blood samples from patients with COVID-19      | Beijing Youan Hospital, Capital Medical University; Wuhan Union Hospital, Huazhong University of Science and Technology | N/A                        |
| biological sample (human) | Blood samples from volunteers without COVID-19 | Beijing Tongren Hospital, Capital Medical University                                                                    | N/A                        |
| biological sample (human) | Human lung samples                             | Beijing Youan Hospital, Capital Medical University                                                                      | N/A                        |
| antibody                  | CTSL                                           | R&D System                                                                                                              | AF952                      |
| antibody                  | $\alpha$ -tubulin                              | Proteintech                                                                                                             | 66031-1-Ig                 |
| antibody                  | $\beta$ -actin                                 | Proteintech                                                                                                             | 66009-1-Ig                 |
| antibody                  | Calreticulin                                   | Cellsignal                                                                                                              | 112238                     |
| antibody                  | GM130                                          | BD Biosciences                                                                                                          | 610822                     |
| antibody                  | Lamp1                                          | PTM BIO                                                                                                                 | PTM-5775                   |
| antibody                  | Goat IgG                                       | Beyotime                                                                                                                | A7007                      |
| antibody                  | Rabbit IgG                                     | Beyotime                                                                                                                | A7016                      |
| antibody                  | Mouse IgG                                      | Beyotime                                                                                                                | A7028                      |
| sequence-based reagent    | Primer: CTSL (human) - F                       | Beijing Biolino CO.,LTD                                                                                                 | AAACTGGGAGGCTTATC<br>TCACT |
| sequence-based reagent    | Primer: CTSL (human) - R                       | Beijing Biolino CO.,LTD                                                                                                 | GCATAATCCATTAGGCC<br>ACCAT |
| sequence-based reagent    | Primer: CTSL (mouse) - F                       | Beijing Biolino CO.,LTD                                                                                                 | CTACACAACGGGGAAT<br>ACAGC  |

|                         |                                                  |                         |                           |
|-------------------------|--------------------------------------------------|-------------------------|---------------------------|
| sequence-based reagent  | Primer: CTSL (mouse) - R                         | Beijing Biolino CO.,LTD | CATTGGTCATGTCACCG AAGG    |
| sequence-based reagent  | Primer: $\beta$ -actin (human) – F               | Beijing Biolino CO.,LTD | TCATGAAGTGTGACGTG GACATC  |
| sequence-based reagent  | Primer: $\beta$ -actin (human) – R               | Beijing Biolino CO.,LTD | CAGGAGGAGCAATGAT CTTGATCT |
| sequence-based reagent  | Primer: $\beta$ -actin (mouse) – F               | Beijing Biolino CO.,LTD | GTGACGTTGACATCCGT AAAGA   |
| sequence-based reagent  | Primer: $\beta$ -actin (mouse) – R               | Beijing Biolino CO.,LTD | GCCGGACTCATCGTACT CC      |
| commercial assay or kit | Human ACE2 Elisa kit                             | Cloud-Clone Corp        | Cat. No L220216094        |
| commercial assay or kit | Human CTSL ELISA Kit                             | Elabscience             | Cat. No E-EL-H0671        |
| commercial assay or kit | Human CTSB ELISA kit                             | Elabscience             | Cat. No E-EL-H6151        |
| commercial assay or kit | Mouse insulin ELISA kit                          | Millipore               | Cat. No EZRMI-13K         |
| commercial assay or kit | Britelite Plus Kit                               | Perkinelmer             | Cat. No 6066761           |
| commercial assay or kit | Cell Counting Kit                                | Transgen                | Cat. No FC101-04          |
| commercial assay or kit | RNAPrep Pure Cell/ Bacteria kit                  | Tiagen                  | Cat. No DP430             |
| commercial assay or kit | RNAPrep Pure Tissue kit                          | Tiagen                  | Cat. No DP431             |
| chemical compound, drug | Ac-FR-AFC                                        | R&D                     | Cat. No ES009             |
| chemical compound, drug | TransScript First-Strand cDNA Synthesis SuperMix | Transgen                | Cat. No AT301             |



|                             |                                        |                       |                                                                                                                           |
|-----------------------------|----------------------------------------|-----------------------|---------------------------------------------------------------------------------------------------------------------------|
| chemical compound, drug     | TransStart Tip Green qPCR SuperMix     | Transgen              | Cat. No AQ141                                                                                                             |
| software, algorithm         | Image J                                | Image J Software      | <a href="https://imagej.net/software/imagej/">https://imagej.net/software/imagej/</a>                                     |
| software, algorithm         | Graphpad prism 7.0                     | GraphPad Software     | <a href="https://www.graphpad.com">https://www.graphpad.com</a>                                                           |
| software, algorithm         | SPSS for Windows 17.0                  | IBM SPSS Software     | <a href="https://www.ibm.com/analytcs/spss-statistics-software">https://www.ibm.com/analytcs/spss-statistics-software</a> |
| software, algorithm         | Microsoft Office Home and Student 2019 | Microsoft Corporation | <a href="https://www.microsoft.com/microsoft-365">https://www.microsoft.com/microsoft-365</a>                             |
| Bacterial and virus strains | G*ΔG-VSV                               | Kerafast              | Cat#EH1020-PM                                                                                                             |

1

## 2 **Experimental model and study participant details**

### 3 **Patients and clinical samples**

4 The study protocol was approved by the Ethics Committee of Beijing Tongren Hospital,  
5 Capital Medical University (TRECKY2020-013, TRECKY2021-202). The retrospective  
6 cohort study included 207 COVID-19 patients from two hospitals. 120 adult COVID-19  
7 inpatients admitted to Wuhan Union Hospital, Huazhong University of Science and  
8 Technology (Wuhan, China) between January 29 and March 20, 2020. Another 87  
9 consecutive COVID-19 inpatients were hospitalized at Beijing Youan Hospital, Capital  
10 Medical University (Beijing, China) between January 21 and April 30, 2020. 31 COVID-19  
11 patients with diabetes and 31 COVID-19 patients without diabetes were matched for gender  
12 and age and included in the final analysis. The clinical features are presented in  
13 [Supplementary Table 1](#). SARS-CoV-2 was detected in respiratory specimens using real-time  
14 RT-PCR, following the protocol recommended by the World Health Organization.

1 COVID-19 was classified into four categories: mild, moderate, severe and critical, according  
2 to the clinical classification criteria (<http://www.nhc.gov.cn/>). Patients from Beijing Youan  
3 Hospital, Capital Medical University were further followed up. They experienced a mean of  
4 14 days of hospitalization and were followed up on the 14th day (Day 14) and 28th day (Day  
5 28) after discharge from the hospital. Blood samples were collected shortly after the  
6 admission to the hospital (Day 0) and on Day 14 and Day 28. Demographic, clinical, and  
7 laboratory data were extracted from the electronic hospital information system using a  
8 standardized form.

9 Another total of 122 age- and gender-matched diabetic and non-diabetic volunteers  
10 without COVID-19 were recruited in Beijing Tongren Hospital, Capital Medical University.  
11 Blood samples were collected after overnight fasting for the determination of CTSL activity  
12 and concentration and other biochemical parameters. All biochemical measurements have  
13 participated in the Chinese Ministry of Health Quality Assessment Program. The  
14 demographic and clinical characteristics are shown in [Supplementary Table 2](#).

15 Human lung tissue samples were obtained from 6 patients who underwent lung surgery at  
16 Beijing Tongren Hospital between March 22 and June 22, 2022. The baseline characteristics  
17 are presented in [Supplementary Table 4](#).

18 The plasma samples of hyperglycemic clamp study were from a previously conducted  
19 clinical trial (NCT03972215). Fifteen healthy male research subjects were received a  
20 160-min hyperglycemic clamp study with a baseline blood glucose level + 6.9 mmol/L as  
21 the target level. Blood samples were obtained at intervals throughout the clamp study. The  
22 plasma was collected and stored at -80°C until use.

### 23 **Experimental mice**

24 The study used 10-week-old db/db mice as diabetic mode and db/m mice as their healthy

1 control, maintained on a KBS background. All mice were obtained from Vital River  
2 Laboratories (Beijing, China). The mice were housed at constant humidity and temperature,  
3 with a 12h light/dark cycle. The protocols for the use of mice were approved by the Ethical  
4 Review Committee at the Institute of Zoology, Capital Medical University.

#### 5 **Cell lines and reagents**

6 The Huh7 (*Homo sapiens*, liver) cell line (Cell Resource Center, Chinese Academy of  
7 Medical Sciences, Beijing, China), was maintained in high glucose Dulbecco's modified  
8 Eagle's medium (DMEM) (Sigma-Aldrich, St. Louis, MO, USA) supplemented with  
9 streptomycin (100 mg/ml), penicillin (100 units/ml), and fetal bovine serum (10%, Gibco,  
10 Carlsbad, CA). The cells were maintained at 37°C in a humidified atmosphere of 5% CO<sub>2</sub>  
11 and 95% air.

#### 12 **Method details**

##### 13 **Detection of SARS-CoV-2 entry related host biomarkers**

14 Plasma samples of patients with COVID-19 at Day 0, Day 14, and Day 28 were collected  
15 and stored at -80 °C within 2 h. The samples were analyzed using commercially available  
16 enzyme-linked immunosorbent assays (ELISA) following the manufacturer's instructions.  
17 All samples were detected without virus inactivation to retain the original results in a P2 +  
18 biosafety laboratory. ACE2 was measured using the Human ACE2 Elisa kit (Cloud-Clone  
19 Corp, Cat. No L220216094). CTSL and CTSB were measured using the Human CTSL  
20 ELISA Kit (Elabscience, Cat. No E-EL-H0671) and Human CTSB ELISA kit (Elabscience,  
21 Cat. No E-EL-H6151). The kits were designed for usage with human serum or plasma  
22 samples and showed no cross-reactions.

##### 23 **Production of pseudovirus**

24 The SARS-CoV-2 pseudovirus were generated with the incorporation of SARS-CoV-2 spike  
25 protein (SARS-2-S) into vesicular stomatitis virus (VSV)-based pseudovirus system. The

1 pseudoviruses used in the current study have been validated in previous studies (Lv *et al*,  
2 2020; Whitt, 2010). For this VSV-based pseudovirus system, the backbone was provided by  
3 VSV-G pseudotyped virus (G\*ΔG-VSV) that packages expression cassettes for firefly  
4 luciferase instead of VSV-G in the VSV genome (Nie *et al*, 2020). Therefore, the luciferase  
5 activity of VSV phosphoprotein (VSV-P) were used for indicators of pseudovirus infection.

### 6 **Pseudovirus infection *in vitro***

7 Huh7 cells were plated in 96-well plates and allowed to adhere until they reached 70%  
8 confluency. Subsequently, these cells were cultured with different medium or serum  
9 obtained from diabetic or euglycemic individuals as indicated. Following this, the cells were  
10 infected with SARS-CoV-2 pseudovirus at  $1.3 \times 10^4$  TCID<sub>50</sub>/ml at 37 °C. After coincubation  
11 with pseudovirus of 24 hours, the activities of firefly luciferases were measured on cell  
12 lysates using luciferase substrate, Britelite Plus Kit (Perkinelmer, Cat. No 6066761)  
13 according to the manufacturer's instructions. The firefly luciferase activity was measured  
14 rapidly using a luminometer (Turner BioSystems, USA) as described previously (Yang *et al*,  
15 2017). Cell viability were measured by CCK assay using Cell Counting Kit (Transgen, Cat.  
16 No FC101-04). The infection rates were adjusted by cell viability.

### 17 **Establishment of *CTSL*-KO Huh7 cell line via CRISPR/Cas9**

18 To produce the *CTSL*-KO cell line, we utilized CRISPR/Cas9 technology. The single guide  
19 RNA (sgRNA) was designed using the Zhang Lab Guide Design Resources  
20 (<https://zlab.bio/guide-design-resources>) tool. The sgRNA scaffold was commercially  
21 obtained from Sangon, with the sequence designed as  
22 5'-CTTTGTGGACATCCCTAAGC-3'. For sgRNA and Cas9 protein to enter into Huh7 cell,  
23 electroporation-mediated transfection was performed. First,  $4 \times 10^5$  Huh7 cells were  
24 centrifuged and re-suspended in 10 μL of Buffer R following the manufacturer's instructions

1 (Invitrogen, USA) for electroporation. Next, Cas9 protein (1  $\mu$ g) and sgRNA (0.2  $\mu$ g) were  
2 added to each sample and mixed gently (Cas9 protein: sgRNA at a 1:1 molar ratio). Huh7  
3 cells were electroporated for 5 times to minimize the *CTSL* gene on a Neon Transfection  
4 device (Invitrogen, USA).

#### 5 **Generation of *CTSL*-KO monoclonal Huh7 cell line**

6 Cells were isolated from the stable *CTSL*-KO Huh7 cell pool by trypsinization and any cell  
7 clumps were broken up into individual cells. Cells concentration was quantitated in this  
8 homogenized cell solution with a cell counter. Then, 100  $\mu$ L of the 5 cells/mL solution was  
9 transferred into each well of a 96-well plate. By doing this, the average density of 0.5  
10 cells/well of the plate was seeded. Seeding an average of 0.5 cells/well ensured that some  
11 wells received a single cell, while minimizing the likelihood that any well receives more  
12 than one cell. Then we observed and recorded the cell growth in the plate for the following  
13 30 days. Once the cells have expanded but before they become over-confluent, we  
14 trypsinized the cells and expanded them to larger culture dishes.

#### 15 **RNA extraction and quantitative real-time PCR analyses**

16 Total RNA was extracted and purified from the cultured Huh7 cells, human and mouse  
17 tissues using RNAPrep Pure Cell/ Bacteria kit (Tiangen, Cat. No DP430) and RNAPrep Pure  
18 Tissue kit (Tiangen, Cat. No DP431) according to the manufacturer's instructions. RNA (0.5  
19  $\mu$ g) was reverse transcribed to cDNA in a final volume (20  $\mu$ L) using TransScript  
20 First-Strand cDNA Synthesis SuperMix (Transgen, Cat. No AT301). RT-PCR analyses were  
21 performed with TransStart Tip Green qPCR SuperMix (Transgen, Cat. No AQ141). Gene  
22 expression values were normalized to the control ( $\beta$ -actin) level. [Supplementary Table 5](#)  
23 provides a list of all primer sequences. Quantitative real-time PCR (qRT-PCR) and data  
24 collection were done on a LightCycler 96 system (Roche, Switzerland).

#### 25 **Intraperitoneal glucose tolerance test (IPGTT)**

1 The db/db and db/m mice were subjected to an overnight fast lasting 16 hours, during which  
2 they were permitted unrestricted access to water. Subsequently, they received an  
3 intraperitoneal injection of 1 g/kg body weight glucose. Blood samples were obtained at 0,  
4 15-, 30-, 60-, and 120-minutes post-glucose injection. Blood glucose levels were determined  
5 using an automatic glucometer (One Touch, LifeScan, USA), while insulin concentrations  
6 were evaluated using a highly sensitive mouse insulin ELISA kit (Millipore, Cat. No  
7 EZRMI-13K), according to the manufacturer's instructions.

### 8 **Western blot analysis**

9 Total protein was extracted from Huh7 cells and human and mouse tissues. The protein  
10 amount was assessed using the BCA protein assay kit (Thermo, Cat. No WH333441).  
11 Samples of 30-50 µg of protein were separated by SDS-PAGE, transferred to PVDF  
12 membrane (Millipore, Cat. No 0000167358), and detected using enhanced  
13 chemiluminescent reaction (Zhao *et al*, 2021a). The antibody information was summarized  
14 in [Supplementary Table 6](#).

### 15 **Analysis of CTSL activity**

16 The activity of CTSL in plasma, human and mouse tissues, Huh7 cells and cell medium was  
17 evaluated using its specific substrate, Ac-FR-AFC (R&D, Cat. No ES009). Prior to  
18 measurement, the cell medium was concentrated using the ultra-tube (Millipore, Cat. No  
19 UFC501096). The test samples were evaluated in the presence of a reaction buffer (100mM  
20 NaAc, 5mM EDTA, pH 5.3). The reaction was conducted in 100 µL system (50µL sample  
21 containing CTSL protein+ 47µL reaction buffer + 1 µL DTT (1 mM) + 2 µL substrate  
22 Ac-FR-AFC (10 mM)) in 96-well black plates. The plates were cultured at 37°C for 2 h in  
23 light avoidance incubator. The fluorescence emitted from the samples was then measured  
24 using a fluorescence plate reader (Infinite 200, TECAN, China) at the Ex = 380 nm, Em =

1 460 nm wavelengths.

## 2 **Immunofluorescence assay**

3 The CTSL, calreticulin, Golgi membrane protein 130 ([GM130](#)) and lysosomal associated  
4 membrane protein 1 ([Lamp 1](#)) distributions in the Huh7 cells were visualized by  
5 immunofluorescent staining. The CTSL, calreticulin, GM130 and Lamp1 antibody species  
6 source IgG were used as negative control ([Supplementary Fig. 3](#)). Briefly, Huh7 cells was  
7 cultured in 35mm confocal dishes after poly-l-lysine coating. After high/low glucose  
8 treatment for 96 h, Huh7 cells were then fixed by 4% paraformaldehyde (PFA) and  
9 permeabilized by a detergent 0.25% triton X-100. A specific primary antibody is applied on  
10 the Huh7 cell surface at 4 °C overnight. After wash out, the secondary antibody is applied  
11 at room temperature for 1 hour avoid from light. All pictures were captured under Laser  
12 Scanning Confocal Microscopy (FV3000RS, Olympus, Japan). The antibodies information  
13 was summarized in [Supplementary Table 6](#).

## 14 **Quantification and statistical analysis**

15 Clinical data are shown as percentage or median, as appropriate. Comparison of continuous  
16 data between two independent groups was performed using the Mann–Whitney *U*-test. An  
17 unpaired *t* test was used for comparing the averages/means of two independent or unrelated  
18 groups. A paired *t*-test was used to test whether the mean difference between pairs of  
19 measurements is existing. Analysis of variance (ANOVA) was used for checking if the  
20 means of two or more categories are significantly different from each other. Spearman’s rho  
21 test (two-tailed) was used to analyze nonparametric correlations of parameters correlated  
22 with CTSL levels and diabetes. Fluorescence intensity was calculated by Plot Profile tool in  
23 Image J software. Graphpad prism 7.0 software and SPSS for Windows 17.0 were used for  
24 statistical analysis, with statistical significance set at two-sided. \**P* < 0.05, \*\**P* < 0.01, \*\*\**P*

1 < 0.001, \*\*\*\* $P < 0.0001$ .

## 2 **Acknowledgment**

3 We thank participants and staff of the case-control studies for their valuable contributions.

4 This work was supported by grants from National Natural Science Foundation of China  
5 (82341076; 81930019). This work was also supported by grants from National Natural  
6 Science Foundation of China (82300917), Beijing Municipal Administration of Hospitals  
7 Incubating Program (PX20240203) and Foundation of Beijing Tongren Hospital to the  
8 Outstanding Youths to M.M.Z.

## 9 **Author contributions**

10 J.K.Y. conceived the idea for the study, designed the experiments and wrote the final  
11 manuscript. Q.H. and M.M.Z. designed and performed the experiments and wrote the first  
12 draft of the manuscript. M.J.L. and X.Y.L. performed pseudovirus assays and  
13 immunofluorescence assays. J.M.J., Y.M.F., F.Y.Y. and M.M.Z. collected the clinical data.  
14 L.Z. and W.J.H. partially participated the pseudovirus assays.

## 15 **Lead Contact**

16 The data that support the findings of this study are available from the Leading Contact, Dr.  
17 Jin-Kui Yang ([jkyang@ccmu.edu.cn](mailto:jkyang@ccmu.edu.cn)).

## 18 **Conflict of interests**

19 The authors declare no competing interests.

## 20 **Materials Availability**

21 All the unique reagents generated in this study are available from the Lead Contact with a  
22 completed Materials Transfer Agreement.

## 23 **Supplementary information**

24 Figure S1 to S4



1 Table S1 to S6

2

### 3 **References**

4 Ciotti M, Ciccozzi M, Terrinoni A, Jiang WC, Wang CB, Bernardini S (2020) The COVID-19 pandemic.

5 *Crit Rev Clin Lab Sci* 57: 365-388

6 Coutinho MF, Prata MJ, Alves S (2012) Mannose-6-phosphate pathway: a review on its role in

7 lysosomal function and dysfunction. *Mol Genet Metab* 105: 542-550

8 Crawford SA, Wiles TA, Wenzlau JM, Powell RL, Barbour G, Dang M, Groegler J, Barra JM, Burnette

9 KS, Hohenstein AC *et al* (2022) Cathepsin D Drives the Formation of Hybrid Insulin Peptides

10 Relevant to the Pathogenesis of Type 1 Diabetes. *Diabetes* 71: 2793-2803

11 Dennis JM, Mateen BA, Sonabend R, Thomas NJ, Patel KA, Hattersley AT, Denaxas S, McGovern

12 AP, Vollmer SJ (2021) Type 2 Diabetes and COVID-19-Related Mortality in the Critical Care Setting:

13 A National Cohort Study in England, March-July 2020. *Diabetes Care* 44: 50-57

14 Ding L, Goossens GH, Oligschlaeger Y, Houben T, Blaak EE, Shiri-Sverdlov R (2020) Plasma

15 cathepsin D activity is negatively associated with hepatic insulin sensitivity in overweight and obese

16 humans. *Diabetologia* 63: 374-384

17 Fernandez C, Rysa J, Almgren P, Nilsson J, Engstrom G, Orho-Melander M, Ruskoaho H, Melander

18 O (2018) Plasma levels of the proprotein convertase furin and incidence of diabetes and mortality. *J*

19 *Intern Med* 284: 377-387

20 Garreta E, Prado P, Stanifer ML, Monteil V, Marco A, Ullate-Agote A, Moya-Rull D, Vilas-Zornoza A,

21 Tarantino C, Romero JP *et al* (2022) A diabetic milieu increases ACE2 expression and cellular

22 susceptibility to SARS-CoV-2 infections in human kidney organoids and patient cells. *Cell Metab* 34:

- 1 857-873 e859
- 2 Gerich JE (2003) Contributions of insulin-resistance and insulin-secretory defects to the pathogenesis  
3 of type 2 diabetes mellitus. *Mayo Clin Proc* 78: 447-456
- 4 Gupta A, Madhavan MV, Sehgal K, Nair N, Mahajan S, Sehrawat TS, Bikdeli B, Ahluwalia N, Ausiello  
5 JC, Wan EY *et al* (2020) Extrapulmonary manifestations of COVID-19. *Nat Med* 26: 1017-1032
- 6 Hardtner C, Morke C, Walther R, Wolke C, Lendeckel U (2013) High glucose activates the alternative  
7 ACE2/Ang-(1-7)/Mas and APN/Ang IV/IRAP RAS axes in pancreatic beta-cells. *Int J Mol Med* 32:  
8 795-804
- 9 Hua Li WWaHX (2022) Drug discovery is an eternal challenge for the biomedical sciences. *Acta*  
10 *Materia Medica* 1(1):1-3
- 11 Ishidoh K, Kominami E (2002) Processing and activation of lysosomal proteinases. *Biol Chem* 383:  
12 1827-1831
- 13 Jackson CB, Farzan M, Chen B, Choe H (2022) Mechanisms of SARS-CoV-2 entry into cells. *Nat*  
14 *Rev Mol Cell Biol* 23: 3-20
- 15 Khunti K, Knighton P, Zaccardi F, Bakhai C, Barron E, Holman N, Kar P, Meace C, Sattar N, Sharp S  
16 *et al* (2021) Prescription of glucose-lowering therapies and risk of COVID-19 mortality in people with  
17 type 2 diabetes: a nationwide observational study in England. *Lancet Diabetes Endocrinol* 9: 293-303
- 18 Limonte CP, Valo E, Drel V, Natarajan L, Darshi M, Forsblom C, Henderson CM, Hoofnagle AN, Ju W,  
19 Kretzler M *et al* (2022) Urinary Proteomics Identifies Cathepsin D as a Biomarker of Rapid eGFR  
20 Decline in Type 1 Diabetes. *Diabetes Care* 45: 1416-1427
- 21 Lu Y, Sun X, Peng L, Jiang W, Li W, Yuan H, Cai J (2020) Angiotensin II-Induced vascular remodeling  
22 and hypertension involves cathepsin L/V- MEK/ERK mediated mechanism. *Int J Cardiol* 298: 98-106

- 1 Lv Z, Deng YQ, Ye Q, Cao L, Sun CY, Fan C, Huang W, Sun S, Sun Y, Zhu L *et al* (2020) Structural  
2 basis for neutralization of SARS-CoV-2 and SARS-CoV by a potent therapeutic antibody. *Science*  
3 369: 1505-1509
- 4 Mazucanti CH, Egan JM (2020) SARS-CoV-2 disease severity and diabetes: why the connection and  
5 what is to be done? *Immun Ageing* 17: 21
- 6 Mizuiri S, Hemmi H, Arita M, Ohashi Y, Tanaka Y, Miyagi M, Sakai K, Ishikawa Y, Shibuya K, Hase H  
7 *et al* (2008) Expression of ACE and ACE2 in individuals with diabetic kidney disease and healthy  
8 controls. *Am J Kidney Dis* 51: 613-623
- 9 Moradi-Marjaneh R, Asgharzadeh F, Khordad E, Marjaneh MM (2021) Diabetes and COVID-19; a  
10 Review of Possible Mechanisms. *Curr Pharm Des* 27: 2522-2527
- 11 Muralidar S, Gopal G, Visaga Ambi S (2021) Targeting the viral-entry facilitators of SARS-CoV-2 as a  
12 therapeutic strategy in COVID-19. *J Med Virol* 93: 5260-5276
- 13 Nie J, Li Q, Wu J, Zhao C, Hao H, Liu H, Zhang L, Nie L, Qin H, Wang M *et al* (2020) Establishment  
14 and validation of a pseudovirus neutralization assay for SARS-CoV-2. *Emerging microbes &*  
15 *infections* 9: 680-686
- 16 Nie X, Qian L, Sun R, Huang B, Dong X, Xiao Q, Zhang Q, Lu T, Yue L, Chen S *et al* (2021)  
17 Multi-organ proteomic landscape of COVID-19 autopsies. *Cell* 184: 775-791 e714
- 18 Rao S, Lau A, So HC (2020) Exploring Diseases/Traits and Blood Proteins Causally Related to  
19 Expression of ACE2, the Putative Receptor of SARS-CoV-2: A Mendelian Randomization Analysis  
20 Highlights Tentative Relevance of Diabetes-Related Traits. *Diabetes Care* 43: 1416-1426
- 21 Reich HN, Oudit GY, Penninger JM, Scholey JW, Herzenberg AM (2008) Decreased glomerular and  
22 tubular expression of ACE2 in patients with type 2 diabetes and kidney disease. *Kidney Int* 74:

1 1610-1616

2 Reiser J, Adair B, Reinheckel T (2010) Specialized roles for cysteine cathepsins in health and  
3 disease. *J Clin Invest* 120: 3421-3431

4 Reiser J, Oh J, Shirato I, Asanuma K, Hug A, Mundel TM, Honey K, Ishidoh K, Kominami E,  
5 Kreidberg JA *et al* (2004) Podocyte migration during nephrotic syndrome requires a coordinated  
6 interplay between cathepsin L and alpha3 integrin. *J Biol Chem* 279: 34827-34832

7 Shi Q, Shen Q, Liu Y, Shi Y, Huang W, Wang X, Li Z, Chai Y, Wang H, Hu X *et al* (2022) Increased  
8 glucose metabolism in TAMs fuels O-GlcNAcylation of lysosomal Cathepsin B to promote cancer  
9 metastasis and chemoresistance. *Cancer Cell* 40: 1207-1222 e1210

10 Shi Q, Zhang X, Jiang F, Zhang X, Hu N, Bimu C, Feng J, Yan S, Guan Y, Xu D *et al* (2020) Clinical  
11 Characteristics and Risk Factors for Mortality of COVID-19 Patients With Diabetes in Wuhan, China:  
12 A Two-Center, Retrospective Study. *Diabetes Care* 43: 1382-1391

13 Shimada N, Ohno-Matsui K, Iseki S, Koike M, Uchiyama Y, Wang J, Yoshida T, Sato T, Peters C,  
14 Mochizuki M *et al* (2010) Cathepsin L in bone marrow-derived cells is required for retinal and  
15 choroidal neovascularization. *Am J Pathol* 176: 2571-2580

16 Tong L, Xiao X, Li M, Fang S, Ma E, Yu X, Zhu Y, Wu C, Tian D, Yang F *et al* (2022) A glucose-like  
17 metabolite deficient in diabetes inhibits cellular entry of SARS-CoV-2. *Nat Metab* 4: 547-558

18 Tournu C, Obled A, Roux MP, Deval C, Ferrara M, Bechet DM (1998) Glucose controls cathepsin  
19 expression in Ras-transformed fibroblasts. *Arch Biochem Biophys* 360: 15-24

20 Whitt MA (2010) Generation of VSV pseudotypes using recombinant DeltaG-VSV for studies on virus  
21 entry, identification of entry inhibitors, and immune responses to vaccines. *J Virol Methods* 169:  
22 365-374

- 1 Williamson EJ, Walker AJ, Bhaskaran K, Bacon S, Bates C, Morton CE, Curtis HJ, Mehrkar A, Evans
- 2 D, Inglesby P *et al* (2020) Factors associated with COVID-19-related death using OpenSAFELY.
- 3 *Nature* 584: 430-436
- 4 Wrapp D, Wang N, Corbett KS, Goldsmith JA, Hsieh CL, Abiona O, Graham BS, McLellan JS (2020)
- 5 Cryo-EM structure of the 2019-nCoV spike in the prefusion conformation. *Science* 367: 1260-1263
- 6 Yang W, Wang J, Chen Z, Chen J, Meng Y, Chen L, Chang Y, Geng B, Sun L, Dou L *et al* (2017)
- 7 NFE2 Induces miR-423-5p to Promote Gluconeogenesis and Hyperglycemia by Repressing the
- 8 Hepatic FAM3A-ATP-Akt Pathway. *Diabetes* 66: 1819-1832
- 9 Zhao MM, Lu J, Li S, Wang H, Cao X, Li Q, Shi TT, Matsunaga K, Chen C, Huang H *et al* (2021a)
- 10 Berberine is an insulin secretagogue targeting the KCNH6 potassium channel. *Nat Commun* 12: 5616
- 11 Zhao MM, Yang WL, Yang FY, Zhang L, Huang WJ, Hou W, Fan CF, Jin RH, Feng YM, Wang YC *et*
- 12 *al* (2021b) Cathepsin L plays a key role in SARS-CoV-2 infection in humans and humanized mice and
- 13 is a promising target for new drug development. *Signal Transduct Target Ther* 6: 134
- 14 Zhao MM, Zhu Y, Zhang L, Zhong G, Tai L, Liu S, Yin G, Lu J, He Q, Li MJ *et al* (2022) Novel
- 15 cleavage sites identified in SARS-CoV-2 spike protein reveal mechanism for cathepsin L-facilitated
- 16 viral infection and treatment strategies. *Cell Discov* 8: 53
- 17
- 18

Fig. 1

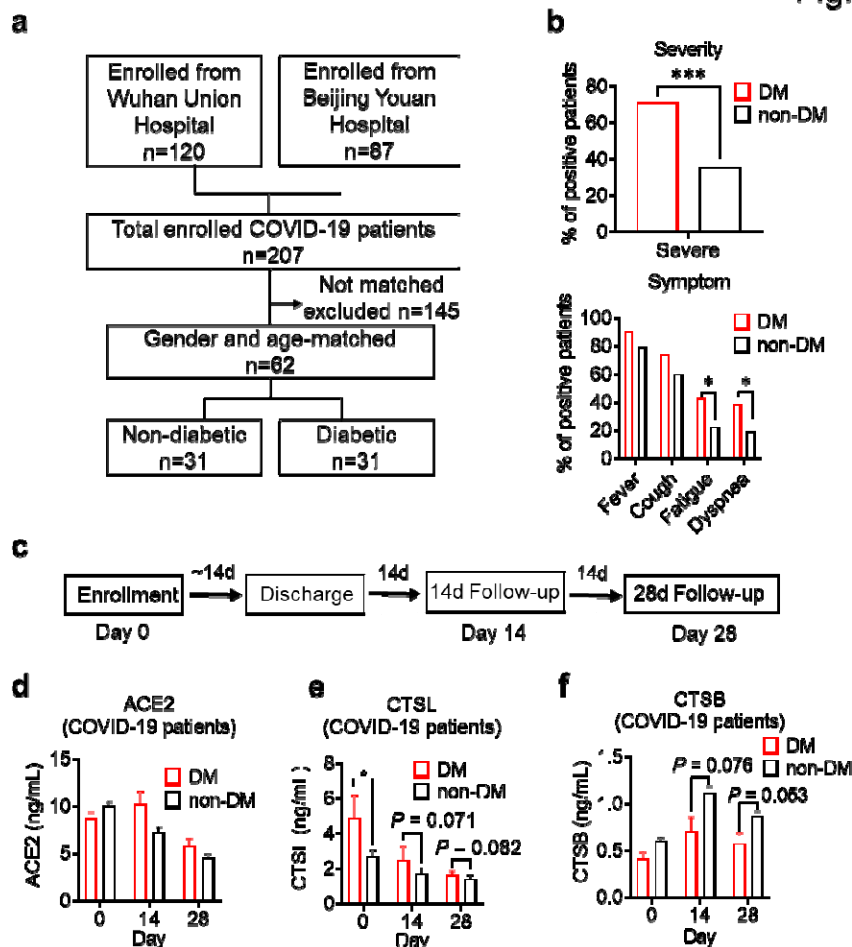

1

2 **Fig. 1 Disease severity and CTSL levels in COVID-19 patients with and without diabetes.**

3 **a** Design and inclusion flowchart of the case-control study. Out of 207 COVID-19 patients from two  
 4 hospitals, 62 were included in the study after matching for gender and age, 31 with diabetes and 31  
 5 without. **b** Comparison of symptom severity and prevalence between diabetic and non-diabetic  
 6 COVID-19 patients. **c** Study design and timeline of the enrollment and follow-up study. After admitted to  
 7 the hospital (Day 0), patients were hospitalized for a mean duration of 14 days, followed up 14 days (Day  
 8 14) and 28 days (Day 28) after discharge, and blood samples were collected at each time point. **d-f**  
 9 Plasma levels of COVID-19 related proteins were measured in diabetic and non-diabetic COVID-19  
 10 patients on Day 0, Day 14, and Day 28. Statistical significance was assessed by unpaired *t*-test (**b**) and  
 11 Mann-Whitney *U*-test (**d-f**). The data are presented as the means  $\pm$  SEM. \**P* < 0.05, \*\*\**P* < 0.001.

12

Fig. 2

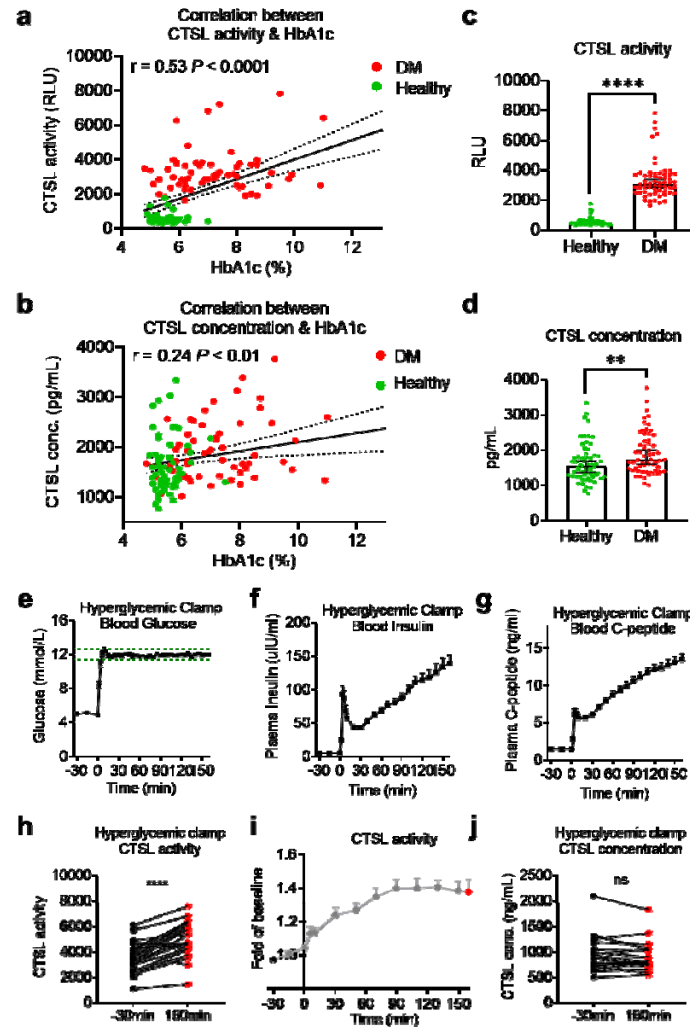

1  
2  
3  
4  
5  
6  
7  
8  
9  
10  
11  
12  
13  
14  
15  
16  
17

**Fig. 2 Impact of chronic and acute hyperglycemia on CTSL concentration and activity.**

**a-d** Effects of chronic hyperglycemia on CTSL activity and concentration in 122 gender- and age-matched individuals without COVID-19, including 61 euglycemic volunteers and 61 diabetic patients. **a** Correlation between plasma CTSL activity and blood glucose level indicated by HbA1c. **b** Correlation between plasma CTSL concentration and HbA1c. The dashed line represents the 95% CI in **a** and **b**. **c** Comparison of plasma CTSL activity between the euglycemic and diabetic groups. **d** Comparison of plasma CTSL concentration between the euglycemic and diabetic groups. The data are presented as the median with 95% CI in **c** and **d**. **e-g** Hyperglycemic clamp study performed in 15 healthy male subjects. **e** Plasma glucose levels in subjects throughout the clamp study. The dashed lines represent the range of  $\pm 5\%$  of the hyperglycemic target level, i.e., basal blood glucose level + 6.9 mmol/L. **f** Insulin levels and **g** proinsulin C-peptide levels throughout the clamp study. **h-j** Effects of acute hyperglycemia on CTSL concentration and activity in 15 healthy male volunteers. **h** Plasma CTSL activity at the beginning and the end of the clamp study. **i** Plasma CTSL activity throughout the clamp study. **j** Plasma CTSL concentration at the beginning and the end of the clamp study. Statistical significance was assessed by Spearman correlation analysis (**a** and **b**), unpaired *t*-test (**c** and **d**) and paired *t*-test (**h** and **j**). The data are presented as the means  $\pm$  SEM. \*\* $P < 0.01$ , \*\*\*\* $P < 0.0001$ .





1

Fig. 3

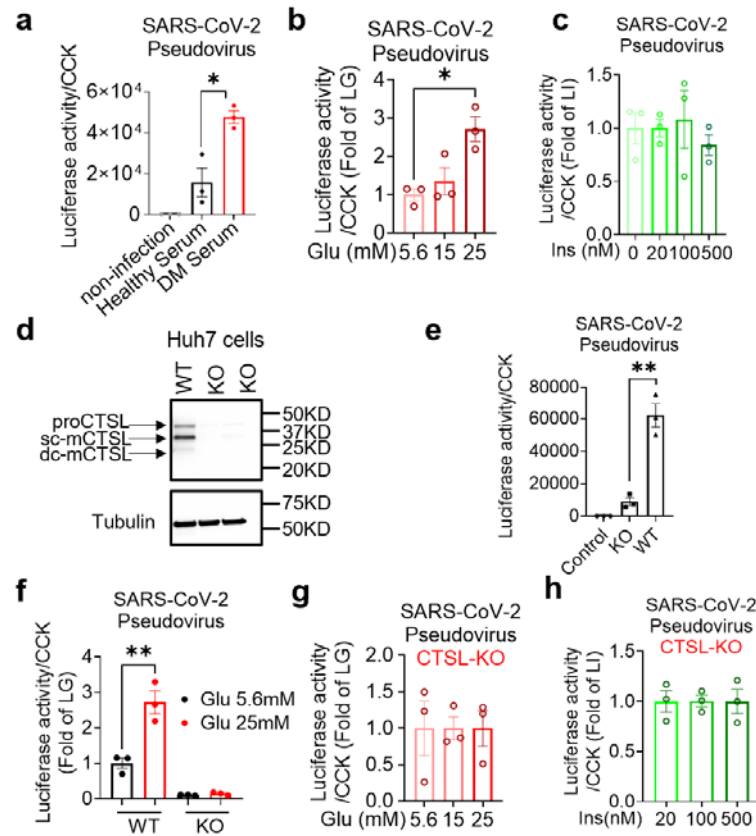

2

3 **Fig. 3 Hyperglycemia enhances SARS-CoV-2 infection through CTSL.**

4 Huh7 cells were infected with SARS-CoV-2 pseudovirus. **a** Wildtype (WT) cells cultured in sera from  
5 healthy and diabetic individuals were infected with SARS-CoV-2 pseudovirus ( $1.3 \times 10^4$  TCID<sub>50</sub>/ml).  
6 Non-infected cells are used as control. The infection levels, as indicated by luciferase activities, were  
7 adjusted by cell viability, as indicated by CCK ( $n = 3$ ). **b** The SARS-CoV-2 infection rate of WT cells  
8 after being cultured in different doses of glucose (5.6 mM, 15 mM and 25 mM) ( $n = 3$ ). **c** The  
9 SARS-CoV-2 infection rate of WT cells after being cultured in different doses of insulin (0 nM, 20 nM,  
10 100 nM and 500 nM) ( $n = 3$ ). **d** Comparison of CTSL expression in WT and *CTSL* knockout (KO) cell  
11 lines. **e-h** The SARS-CoV-2 pseudovirus infection of WT and *CTSL* KO cells. **e** The SARS-CoV-2  
12 infection rate of control, *CTSL* KO, and WT cells ( $n = 3$ ). **f** The SARS-CoV-2 infection rate of WT and  
13 *CTSL* KO Huh7 cells cultured in different doses of glucose (5.6 mM and 25 mM) ( $n = 3$ ). **g** The  
14 SARS-CoV-2 infection rate of *CTSL* KO Huh7 cells cultured in different doses of glucose (5.6 mM, 15  
15 mM and 25 mM) ( $n = 3$ ). **h** The SARS-CoV-2 infection rate of *CTSL* KO Huh7 cells cultured in different  
16 doses of insulin (20 nM, 100 nM and 500 nM) ( $n = 3$ ). Statistical significance was assessed by one-way  
17 ANOVA with Tukey's post hoc test (**a-c**, **g** and **h**) and Mann-Whitney *U*-test (**e** and **f**). The data are  
18 presented as the means  $\pm$  SEM. \* $P < 0.05$ , \*\* $P < 0.01$ .

19

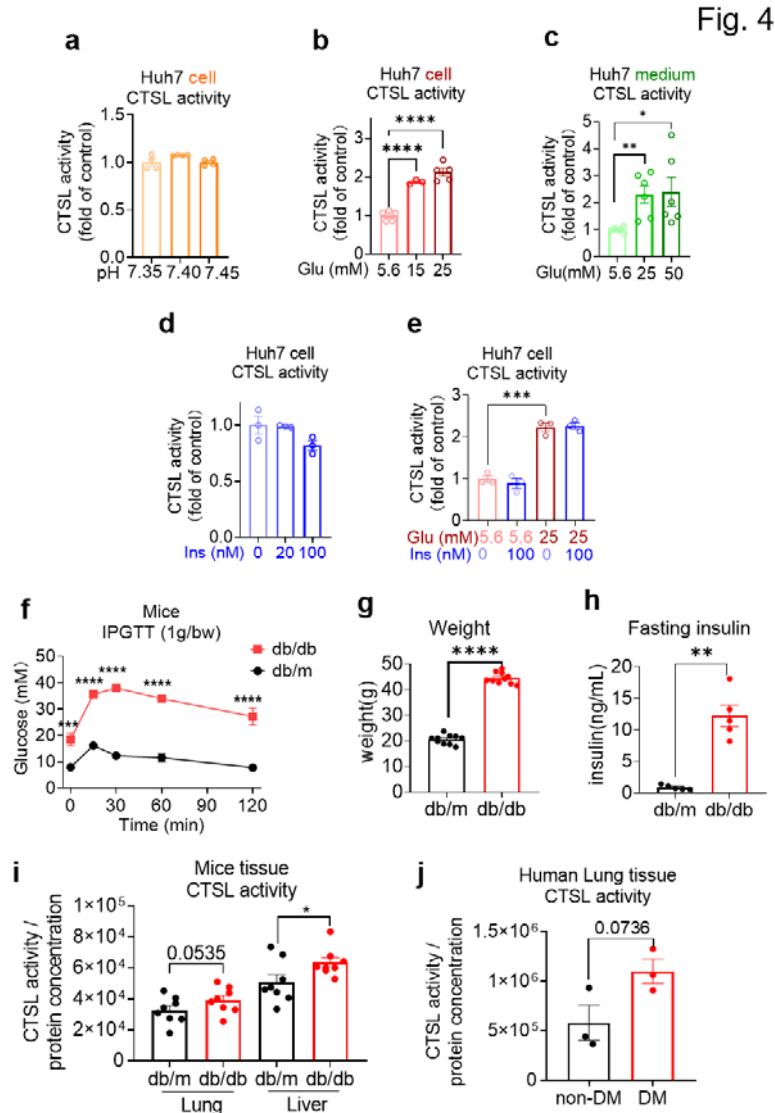

Fig. 4

1  
2 **Fig. 4 Elevation of glucose levels enhance CTSL activity.**

3 Effects of high glucose levels on CTSL activity in Huh7 cells, as well as in biopsy samples of mice and  
4 diabetic patients. **a** Intracellular CTSL activity was measured in Huh7 cells cultured in different pH as  
5 indicated ( $n = 4$ ). **b** Intracellular CTSL activity was measured in Huh7 cells cultured in different glucose  
6 concentrations as indicated ( $n = 3$ ). **c** Extracellular CTSL activity was measured in Huh7 cells cultured in  
7 different glucose concentrations as indicated ( $n = 6$ ). **d** Intracellular CTSL activity was measured in Huh7  
8 cells cultured in different insulin concentration as indicated ( $n = 3$ ). **e** Intracellular CTSL activity was  
9 measured in Huh7 cells cultured in different glucose and insulin concentrations as indicated ( $n = 3$ ). **f**  
10 Blood glucose levels during the intraperitoneal glucose tolerance test (IPGTT) in db/db diabetic and db/m  
11 control mice ( $n = 5$ ). **g** Body weight of db/db and db/m mice was measured ( $n = 10$ ). **h** Fasting insulin  
12 levels were measured in db/db and db/m mice ( $n = 5$ ). **i** CTSL activity was measured in the lung and liver  
13 biopsy samples of db/db and db/m mice ( $n = 8$ ). **j** CTSL activity was measured in human lung biopsy  
14 samples from diabetic (DM) and non-diabetic patients ( $n = 3$ ). Statistical significance was assessed by  
15 one-way ANOVA with Tukey's post hoc test (**a-e**) and unpaired *t*-test (**f-j**). The data are presented as the  
16 means  $\pm$  SEM. \* $P < 0.05$ , \*\* $P < 0.01$ , \*\*\* $P < 0.001$ , \*\*\*\* $P < 0.0001$ .

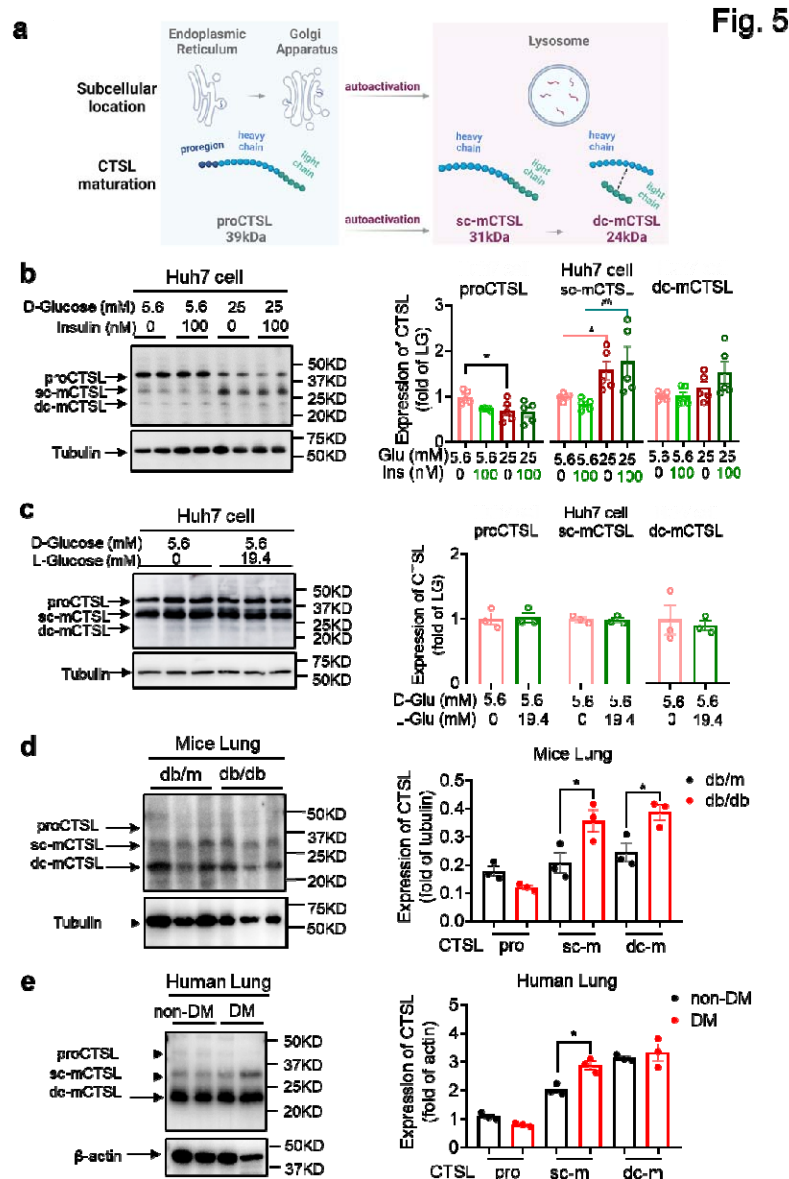

1  
2  
3  
4  
5  
6  
7  
8  
9  
10  
11  
12  
13

**Fig. 5 High glucose levels stimulate CTSL maturation.**

**a** Schematic of the CTSL maturation process. Pro-cathepsin L (ProCTSL, 39 kDa) in endoplasmic reticulum (ER) and Golgi apparatus translocated to the lysosome and autoactivated into the single chain mature cathepsin L (sc-mCTSL, 31 kDa) and double chain mature cathepsin L (dc-mCTSL, 24kDa). **b** Western blot analysis of CTSL protein in Huh7 cells cultured with different doses of D-glucose and insulin as indicated ( $n = 5$ ). **c** Western blot analysis of CTSL protein in Huh7 cells cultured with 5.6 mM D-glucose or D-glucose plus 19.4 mM L-glucose as indicated ( $n = 3$ ). **d** Western blot analysis of CTSL protein in lung tissues from db/db and db/m mice ( $n = 3$ ). **e** Western blot analysis of CTSL protein in human lung tissues from non-diabetic and diabetic patients ( $n = 3$ ). Statistical significance was assessed by one-way ANOVA with Tukey's post hoc test (**b**) and Mann-Whitney  $U$ -test (**c-e**). The data are presented as the means  $\pm$  SEM. \* $P < 0.05$ , ## $P < 0.01$ .

Fig. 6

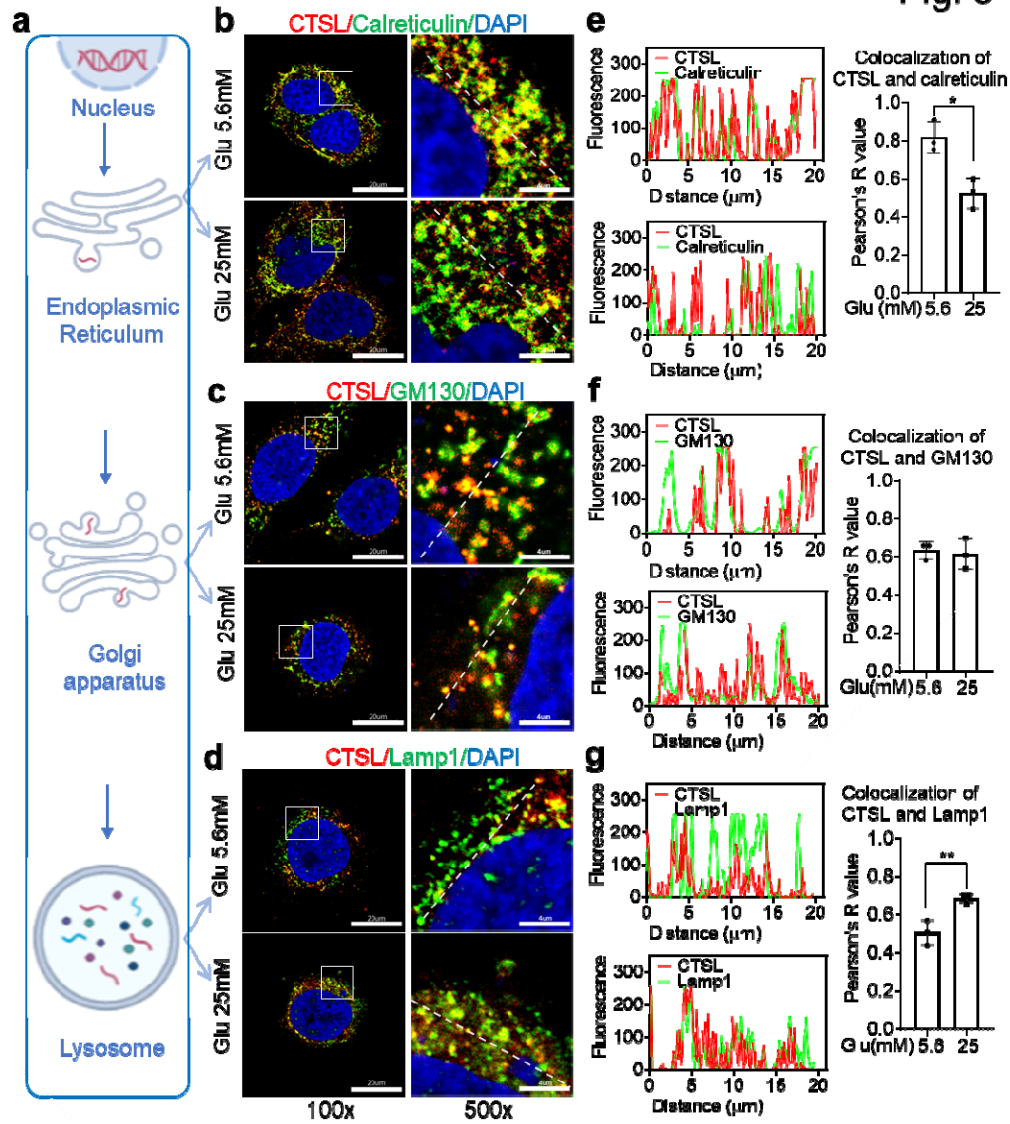

1

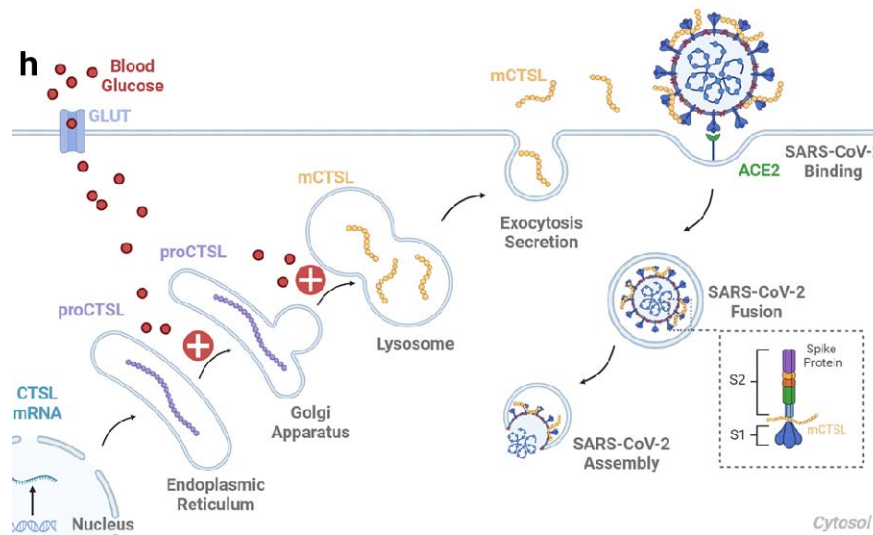

2

1 **Fig. 6 High glucose promotes CTSL translocation from endoplasmic reticulum to lysosome and**  
2 **enhances SARS-CoV-2 infection.**  
3 **a** A diagram illustrating the process of CTSL translocation via the endoplasmic reticulum  
4 (ER)-Golgi-lysosome axis. **b-d** Immunofluorescent staining of Huh7 cells cultured in 5.6 mM or 25 mM  
5 glucose as indicated. Co-localization analysis of CTSL (labeled red) and different organelles (labeled  
6 green) was performed using CTSL and organelle marker protein antibodies. **b** calreticulin for ER, **c**  
7 GM130 for Golgi apparatus, and **d** lamp1 for lysosome. **e-g** Fluorescence co-localization intensity  
8 analysis of the dashed line on the 500 times enlarged immunofluorescence picture. Fluorescence  
9 co-localization intensity was calculated using the Plot Profile tool in Image J software ( $n = 3$ ). Scale bars,  
10 20  $\mu\text{m}$  for 100 x and 4  $\mu\text{m}$  for 500 x. **h** Proposed mechanisms of hyperglycemia drives CTSL maturation  
11 and enhances SARS-CoV-2 infection. (1) Blood glucose increased in diabetic patients. (2) Hyperglycemia  
12 promoted CTSL maturation through the ER-Golgi-lysosome axis. (3) CTSL activity increased and  
13 facilitated SARS-CoV-2 entry, by cleaving the spike protein (consist of S1 and S2 subunits), and  
14 enhanced COVID-19 severity in diabetic patients. All statistical significance was assessed using  
15 Mann-Whitney *U*-test. The data are presented as the means  $\pm$  SEM. \* $P < 0.05$ , \*\* $P < 0.01$ .

1 **Supplementary information for**  
2  
3 **Hyperglycemia-induced cathepsin L maturation: Implications for**  
4 **diabetic comorbidities and COVID-19 susceptibility**

5  
6 Qiong He<sup>1,\*</sup>, Miao-Miao Zhao<sup>1,\*✉</sup>, Ming-Jia Li<sup>1</sup>, Xiao-Ya Li<sup>1</sup>, Jian-Min Jin<sup>2,3</sup>, Ying-Mei  
7 Feng<sup>4</sup>, Li Zhang<sup>5</sup>, Wei-Jin Huang<sup>5</sup>, Fang-Yuan Yang<sup>1</sup>, and Jin-Kui Yang<sup>1✉</sup>

8  
9 <sup>1</sup>Department of Endocrinology, Beijing Diabetes Institute, Beijing Tongren Hospital, Capital Medical  
10 University, Beijing, China

11 <sup>2</sup>Department of Respiratory and Critical Care Medicine, Beijing Tongren Hospital, Capital Medical  
12 University, Beijing, China

13 <sup>3</sup>Department of Internal Medicine, Union Hospital, Tongji Medical College, Huazhong University of  
14 Science and Technology, Wuhan 430022, China.

15 <sup>4</sup>Department of Science and Technology, Beijing Youan Hospital, Capital Medical University, Beijing,  
16 China

17 <sup>5</sup>Division of HIV/AIDS and Sex-Transmitted Virus Vaccines, Institute for Biological Product Control,  
18 National Institutes for Food and Drug Control (NIFDC), Beijing, China

19  
20 \*These authors contributed equally.

21 ✉Correspondence to Jin-Kui Yang ([jk yang@ccmu.edu.cn](mailto:jk yang@ccmu.edu.cn)) or Miao-Miao Zhao ([mmzhao@ccmu.edu.cn](mailto:mmzhao@ccmu.edu.cn)).

22  
23

## Supplementary Fig. 1

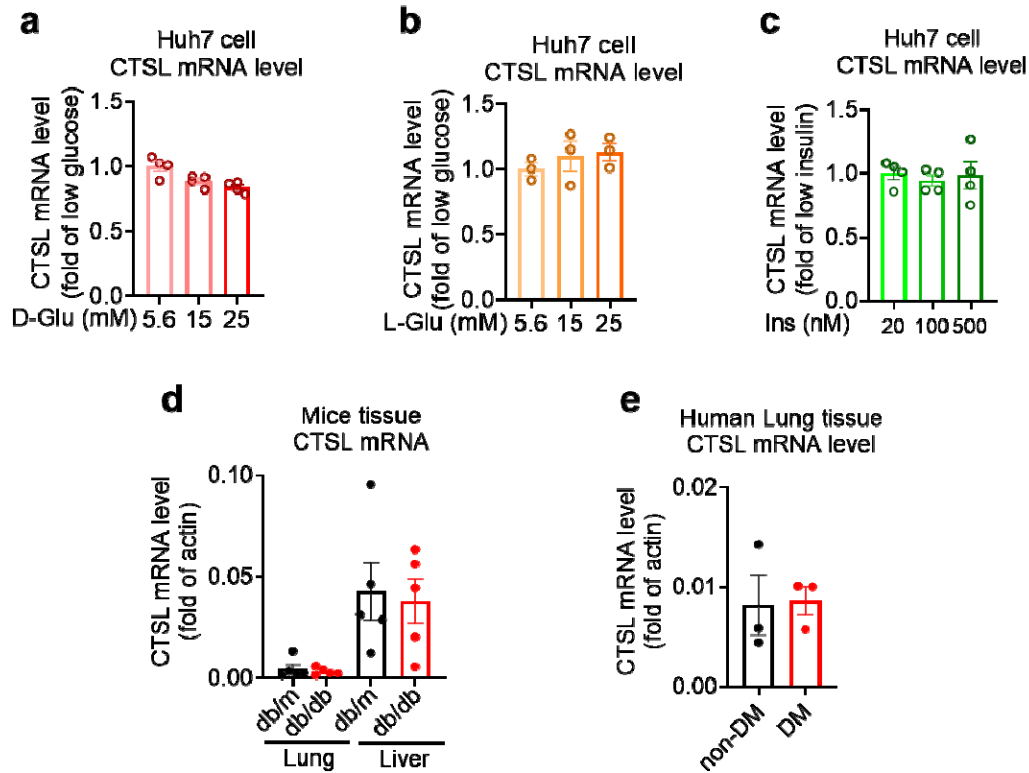

1  
2  
3  
4  
5  
6  
7  
8

**Fig. S1 CTSL mRNA levels remain unchanged under different glucose conditions.**

**a-c** mRNA levels of CTSL in Huh7 cells cultured in media containing different concentrations of **a** D-glucose, **b** L-glucose, and **c** insulin, as indicated ( $n = 3-4$ ). **d** mRNA levels of CTSL in db/db and db/m mouse lung and liver tissues ( $n = 5$ ). **e** mRNA levels of CTSL in human lung tissues ( $n = 3$ ). Significance was assessed by one-way ANOVA with Tukey's post hoc test (**a-c**) and Mann-Whitney  $U$ -test (**d** and **e**). The data are presented as the means  $\pm$  SEM.



## Supplementary Fig. 2

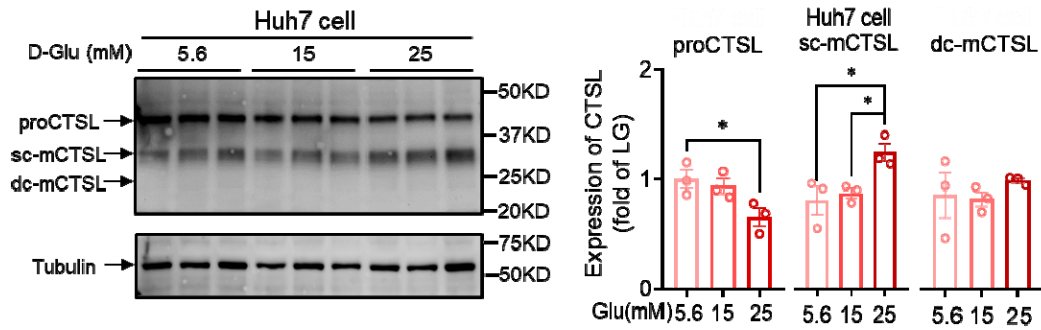

1

2 **Fig. S2 CTSL protein expression in Huh7 cells under different D-glucose concentrations.**

3 CTSL expression in Huh7 cells cultured in media containing different concentrations of D-glucose ( $n = 3$ ).

4 Statistical significance was assessed by one-way ANOVA with Tukey's post hoc test. The data are

5 presented as the means  $\pm$  SEM. \* $P < 0.05$ .

6



### Supplementary Fig. 3

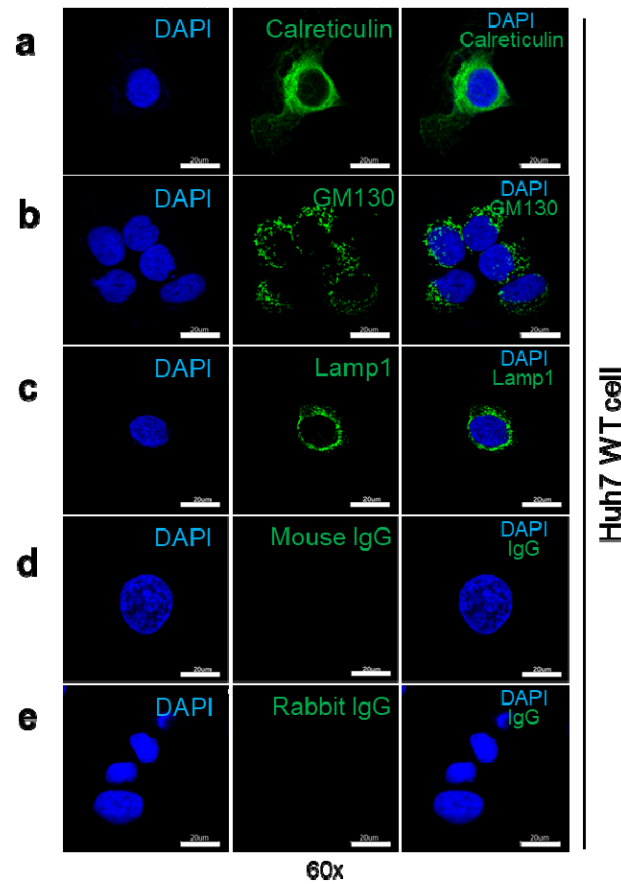

1  
2  
3  
4  
5  
6  
7  
8  
9  
10

**Fig. S3 Immunofluorescent staining of organelle markers representing the endoplasmic reticulum (ER), Golgi apparatus and lysosome.**

**a** Expression of calreticulin (endoplasmic reticulum marker protein) in WT Huh7 cells. **b** Expression of GM130 (Golgi apparatus marker protein) in WT Huh7 cells. **c** Expression of Lamp1 (lysosome marker protein) in WT Huh7 cells. **d** Mouse immunoglobulin G (IgG) was used as a negative control to show the specificity of the primary antibody binding to GM130 and Lamp1 antigen. **e** Rabbit IgG was used as a negative control to show the specificity of the primary antibody binding to calreticulin antigen.

## Supplementary Fig. 4

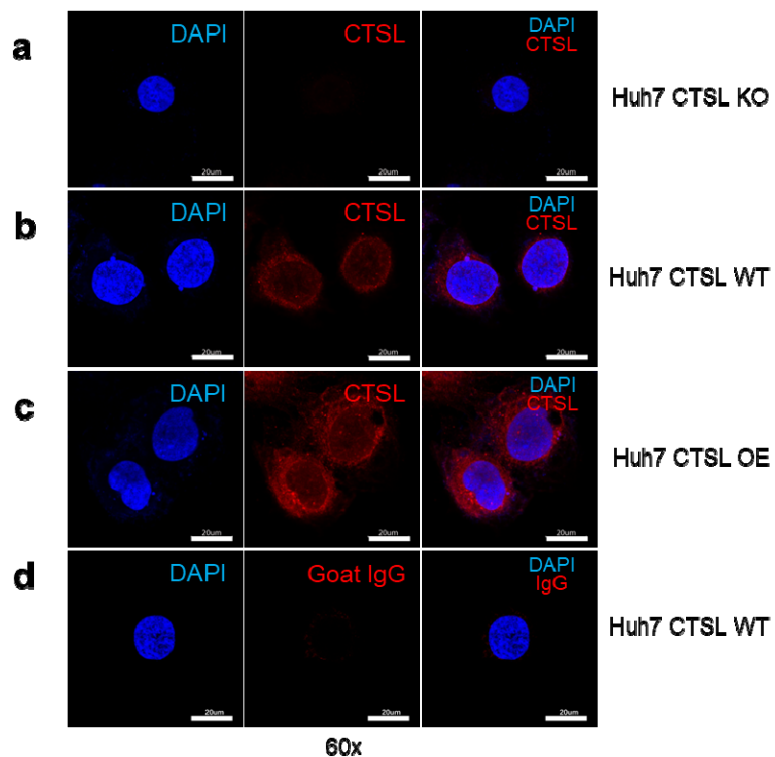

1

2 **Fig. S4 Immunofluorescent staining of CTSL in Huh7 cells.**

3 **a** CTSL expression in wild-type (WT) Huh7 cells. **b** CTSL expression in *CTSL* knockout (KO) Huh7 cells.

4 **c** CTSL expression in overexpression (OE) Huh7 cells. **d** Goat IgG was used as a negative control to

5 show the specificity of the primary antibody binding to CTSL antigen.

6

**Supplementary Table 1 Comparison of clinical features of COVID-19 patients**

|                                              | All patients<br>(n = 62) | COVID-19            |                     | P value        |
|----------------------------------------------|--------------------------|---------------------|---------------------|----------------|
|                                              |                          | DM<br>(n = 31)      | Non-DM<br>(n = 31)  |                |
| Age—years                                    | 60 (52-67)               | 57 (51-65)          | 61 (56-70)          | 0.212†         |
| Male—n (%)                                   | 31 (50%)                 | 19 (61.3%)          | 12 (38.7%)          | 0.075#         |
| Hemoglobin—g/L                               | 129 (117-142)            | 123 (114-135)       | 135 (120-145)       | 0.090†         |
| Platelet count— × 10 <sup>9</sup> /L         | 211 (186-289)            | 205 (161-278)       | 221 (206-293)       | 0.109†         |
| White blood cell count— × 10 <sup>9</sup> /L | 6.04 (4.60-7.94)         | 6.09 (4.82-8.03)    | 5.95 (4.47-7.70)    | 0.469†         |
| Neutrophil percent—%                         | 71.6 (65.6-84.4)         | 77.6 (67.5-89.0)    | 68.2 (65.3-73.5)    | <b>0.007</b> † |
| Lymphocyte percent—%                         | 18.7 (11.4-27.2)         | 14.5 (7.0-21.0)     | 21.7 (17.1-28.1)    | <b>0.006</b> † |
| Potassium—mmol/L                             | 4.03 (3.55-4.41)         | 3.98 (3.52-4.38)    | 4.04 (3.58-4.43)    | 0.897†         |
| Sodium—mmol/L                                | 138.8 (135.7-141.4)      | 136.3 (135.0-140.3) | 139.8 (138.1-142.0) | <b>0.005</b> † |
| Chloride—mmol/L                              | 102.5 (99.1-105.4)       | 100.7 (98.3-104.2)  | 104.2 (100.8-106.0) | <b>0.029</b> † |
| Albumin—g/L                                  | 29.4 (27.3-35.0)         | 28.5 (25.6-34.1)    | 31.6 (27.6-35.7)    | 0.202†         |
| Albumin/Globulin ratio                       | 0.90 (0.70-1.27)         | 0.83 (0.70-1.08)    | 1.05 (0.80-1.33)    | <b>0.013</b> † |
| C-reactive protein—mg/L                      | 29.0 (4.1-70.8)          | 53.4 (16.1-91.9)    | 11.3 (2.0-40.3)     | <b>0.012</b> † |
| Procalcitonin—mg/L                           | 0.08 (0.05-0.16)         | 0.12 (0.07-0.23)    | 0.06 (0.04-0.10)    | <b>0.013</b> † |
| Alanine aminotransferase—U/L                 | 38 (24-50)               | 40 (28-53)          | 34 (22-44)          | 0.105†         |
| Aspartate aminotransferase—U/L               | 31 (22-47)               | 34 (27-52)          | 29 (19-40)          | <b>0.037</b> † |
| Creatine kinase—MB—ng/mL                     | 0.44 (0.21-0.88)         | 0.75 (0.43-1.68)    | 0.32 (0.18-0.63)    | <b>0.006</b> † |
| Myoglobin—g/L                                | 47.1 (28.0-75.0)         | 60.4 (39.4-129.5)   | 33.5 (26.1-51.9)    | <b>0.002</b> † |
| Blood urea nitrogen—mmol/L                   | 5.03 (3.41-6.78)         | 5.79 (4.31-7.49)    | 4.10 (3.11-5.47)    | <b>0.019</b> † |
| Creatinine—μmol/L                            | 68.3 (56.9-86.6)         | 74.0 (60.0-94.2)    | 63.5 (52.2-73.4)    | <b>0.017</b> † |

Data are median (IQR) or n (%). P values were calculated by Mann-Whitney U-test (†) or  $\chi^2$  test (#), as appropriate for group comparison analyses.

**Supplementary Table 2 Demographic and clinical characteristics of non-COVID-19 patients**

|                   | All individuals<br>N = 122 | Non-COVID-19           |                        | P              |
|-------------------|----------------------------|------------------------|------------------------|----------------|
|                   |                            | Healthy<br>N = 61      | DM<br>N = 61           |                |
| Age—years         | 59 (55-62)                 | 58 (55-64)             | 60 (58-62)             | 0.141†         |
| Male—n (%)        | 58 (47.5%)                 | 27 (44.3%)             | 31 (50.8%)             | 0.468#         |
| BMI               | 25.01 (22.37-27.34)        | 24.8 (22.2-26.7)       | 25.4 (22.8-27.5)       | 0.347†         |
| HbA1c—%           | 5.85 (5.30-7.13)           | 5.4 (5.2-5.8)          | 7.0 (6.2-8.2)          | <b>0.000</b> † |
| CTSL conc. —pg/mL | 1637.0 (1337.8-2120.9)     | 1535.4 (1251.3-1838.7) | 1715.7 (1408.0-2261.4) | <b>0.009</b> † |
| CTSL activity—RLU | 1708.0 (477.2-3058.7)      | 477.2 (429.8-601.8)    | 3050.0 (2534.0-3713.0) | <b>0.000</b> † |

Data are median (IQR) or n (%). P values were calculated by Mann-Whitney U-test (†) or  $\chi^2$  test (#), as appropriate for group comparison analyses.

1

**Supplementary Table 3 Nonparametric correlations of parameters correlated with CTSL levels and diabetes in non-COVID-19 individuals**

|                    | CTSL activity                     | CTSL conc                        | HbA1c                            | BMI                              | Systolic pressure                | Diastolic pressure                | Waist                            | Hip                               | WHR                              | LDL                               | Serum CREA                       | Age                              | Gender            | Diabetes                         | HBP                              | CHD  |
|--------------------|-----------------------------------|----------------------------------|----------------------------------|----------------------------------|----------------------------------|-----------------------------------|----------------------------------|-----------------------------------|----------------------------------|-----------------------------------|----------------------------------|----------------------------------|-------------------|----------------------------------|----------------------------------|------|
| CTSL activity      | 1.00                              |                                  |                                  |                                  |                                  |                                   |                                  |                                   |                                  |                                   |                                  |                                  |                   |                                  |                                  |      |
| CTSL conc          | <b>0.248</b><br>( <b>0.006</b> )  | 1.00                             |                                  |                                  |                                  |                                   |                                  |                                   |                                  |                                   |                                  |                                  |                   |                                  |                                  |      |
| HbA1c              | <b>0.565</b><br>( <b>0.000</b> )  | <b>0.263</b><br>( <b>0.003</b> ) | 1.00                             |                                  |                                  |                                   |                                  |                                   |                                  |                                   |                                  |                                  |                   |                                  |                                  |      |
| BMI                | 0.162<br>(0.084)                  | 0<br>(0.997)                     | 0.134<br>(0.152)                 | 1.00                             |                                  |                                   |                                  |                                   |                                  |                                   |                                  |                                  |                   |                                  |                                  |      |
| Systolic pressure  | <b>0.314</b><br>( <b>0.001</b> )  | <b>0.415</b><br>( <b>0.000</b> ) | <b>0.294</b><br>( <b>0.002</b> ) | 0.182<br>(0.056)                 | 1.00                             |                                   |                                  |                                   |                                  |                                   |                                  |                                  |                   |                                  |                                  |      |
| Diastolic pressure | <b>-0.235</b><br>( <b>0.012</b> ) | 0.048<br>(0.613)                 | -0.124<br>(0.190)                | <b>0.232</b><br>( <b>0.014</b> ) | <b>0.213</b><br>( <b>0.023</b> ) | 1.00                              |                                  |                                   |                                  |                                   |                                  |                                  |                   |                                  |                                  |      |
| Waist              | 0.045<br>(0.634)                  | 0.075<br>(0.421)                 | 0.139<br>(0.138)                 | <b>0.728</b><br>( <b>0.000</b> ) | <b>0.204</b><br>( <b>0.031</b> ) | <b>0.191</b><br>( <b>0.044</b> )  | 1.00                             |                                   |                                  |                                   |                                  |                                  |                   |                                  |                                  |      |
| Hip                | <b>-0.246</b><br>( <b>0.008</b> ) | -0.023<br>(0.809)                | -0.038<br>(0.688)                | <b>0.572</b><br>( <b>0.000</b> ) | 0.120<br>(0.208)                 | <b>0.284</b><br>( <b>0.002</b> )  | <b>0.678</b><br>( <b>0.000</b> ) | 1.00                              |                                  |                                   |                                  |                                  |                   |                                  |                                  |      |
| WHR                | <b>0.385</b><br>( <b>0.000</b> )  | 0.115<br>(0.222)                 | <b>0.241</b><br>( <b>0.009</b> ) | <b>0.331</b><br>( <b>0.000</b> ) | <b>0.198</b><br>( <b>0.037</b> ) | -0.031<br>(0.744)                 | <b>0.525</b><br>( <b>0.000</b> ) | -0.157<br>(0.093)                 | 1.00                             |                                   |                                  |                                  |                   |                                  |                                  |      |
| LDL                | <b>-0.264</b><br>( <b>0.003</b> ) | 0.066<br>(0.468)                 | -0.058<br>(0.526)                | -0.011<br>(0.903)                | -0.090<br>(0.339)                | <b>0.202</b><br>( <b>0.031</b> )  | 0.007<br>(0.941)                 | 0.089<br>(0.342)                  | -0.098<br>(0.295)                | 1.00                              |                                  |                                  |                   |                                  |                                  |      |
| Serum CREA         | -0.096<br>(0.291)                 | <b>0.189</b><br>( <b>0.037</b> ) | -0.102<br>(0.262)                | 0.041<br>(0.664)                 | 0.071<br>(0.450)                 | 0.103<br>(0.277)                  | 0.177<br>(0.058)                 | 0.131<br>(0.163)                  | 0.070<br>(0.458)                 | -0.066<br>(0.467)                 | 1.00                             |                                  |                   |                                  |                                  |      |
| Age                | <b>0.205</b><br>( <b>0.023</b> )  | <b>0.261</b><br>( <b>0.004</b> ) | <b>0.233</b><br>( <b>0.010</b> ) | 0.028<br>(0.762)                 | <b>0.211</b><br>( <b>0.024</b> ) | -0.065<br>(0.492)                 | 0.085<br>(0.362)                 | 0.045<br>(0.631)                  | 0.122<br>(0.196)                 | 0.065<br>(0.479)                  | -0.046<br>(0.618)                | 1.00                             |                   |                                  |                                  |      |
| Gender             | 0.061<br>(0.504)                  | <b>0.322</b><br>( <b>0.000</b> ) | 0.023<br>(0.801)                 | -0.028<br>(0.768)                | 0.086<br>(0.365)                 | 0.077<br>(0.416)                  | 0.148<br>(0.112)                 | 0.081<br>(0.392)                  | 0.094<br>(0.317)                 | -0.142<br>(0.118)                 | <b>0.528</b><br>( <b>0.000</b> ) | <b>0.217</b><br>( <b>0.016</b> ) | 1.00              |                                  |                                  |      |
| Diabetes           | <b>0.866</b><br>( <b>0.000</b> )  | <b>0.239</b><br>( <b>0.008</b> ) | <b>0.669</b><br>( <b>0.000</b> ) | 0.088<br>(0.350)                 | <b>0.348</b><br>( <b>0.000</b> ) | <b>-0.221</b><br>( <b>0.018</b> ) | -0.003<br>(0.978)                | <b>-0.309</b><br>( <b>0.001</b> ) | <b>0.389</b><br>( <b>0.000</b> ) | <b>-0.270</b><br>( <b>0.003</b> ) | -0.046<br>(0.618)                | <b>0.254</b><br>( <b>0.005</b> ) | 0.066<br>(0.472)  | 1.00                             |                                  |      |
| HBP                | <b>0.676</b><br>( <b>0.000</b> )  | <b>0.188</b><br>( <b>0.038</b> ) | <b>0.593</b><br>( <b>0.000</b> ) | 0.174<br>(0.063)                 | <b>0.397</b><br>( <b>0.000</b> ) | -0.131<br>(0.164)                 | 0.077<br>(0.414)                 | -0.167<br>(0.075)                 | <b>0.303</b><br>( <b>0.001</b> ) | <b>-0.214</b><br>( <b>0.018</b> ) | -0.087<br>(0.342)                | <b>0.233</b><br>( <b>0.010</b> ) | -0.057<br>(0.532) | <b>0.829</b><br>( <b>0.000</b> ) | 1.00                             |      |
| CHD                | <b>0.445</b><br>( <b>0.000</b> )  | <b>0.179</b><br>( <b>0.049</b> ) | <b>0.350</b><br>( <b>0.000</b> ) | <b>0.265</b><br>( <b>0.004</b> ) | <b>0.265</b><br>( <b>0.004</b> ) | -0.037<br>(0.699)                 | <b>0.200</b><br>( <b>0.031</b> ) | -0.040<br>(0.672)                 | <b>0.383</b><br>( <b>0.000</b> ) | -0.164<br>(0.071)                 | 0.090<br>(0.324)                 | <b>0.214</b><br>( <b>0.018</b> ) | 0.046<br>(0.615)  | <b>0.533</b><br>( <b>0.000</b> ) | <b>0.579</b><br>( <b>0.000</b> ) | 1.00 |

Data are correlation coefficient (*P* value). Spearman's rho test (two-tailed).

**Supplementary Table 4: Demographic and clinical characteristics of human lung tissues donor**

|               | No. | Gender | Glucose-mmol/L | LDL-C-mmol/L |
|---------------|-----|--------|----------------|--------------|
| <b>DM</b>     | 1   | Male   | 5.2            | 3.31         |
|               | 2   | Female | 5.6            | 2.49         |
|               | 3   | Male   | 8              | 2.45         |
| <b>Non-DM</b> | 4   | Male   | 6              | 1.64         |
|               | 5   | Female | 5.2            | 3.98         |
|               | 6   | Male   | 4.2            | 4.28         |

Six enrolled patients undergoing lung surgery in general surgery department of Beijing Tongren Hospital ranging from March 22 to June 22, 2022.

1

1 **Supplementary Table 5 List of oligonucleotide primer pairs used in real time RT-PCR analysis**

2

| <b>Primer</b>  | <b>Species</b> | <b>Forward (5'-3')</b>  | <b>Reverse (5'-3')</b>   |
|----------------|----------------|-------------------------|--------------------------|
| CTSL           | human          | AAACTGGGAGGCTTATCTCACT  | GCATAATCCATTAGGCCACCAT   |
| CTSL           | mouse          | CTACACAACGGGAATACAGC    | CATTGGTCATGTCACCGAAGG    |
| $\beta$ -actin | human          | TCATGAAGTGTGACGTGGACATC | CAGGAGGAGCAATGATCTTGATCT |
| $\beta$ -actin | mouse          | GTGACGTTGACATCCGTAAAGA  | GCCGGACTCATCGTACTCC      |

3

**Supplementary Table 6 Specific Antibodies for Western blotting and Immunofluorescence assa**

| <b>Protein</b>    | <b>Company</b> | <b>Catalog</b> | <b>Source</b> |
|-------------------|----------------|----------------|---------------|
| CTSL              | R&D System     | AF952          | Goat IgG      |
| $\alpha$ -tubulin | Proteintech    | 66031-1-Ig     | Mouse IgG     |
| $\beta$ -actin    | Proteintech    | 66009-1-Ig     | Mouse IgG     |
| Calreticulin      | Cellsignal     | 112238         | Rabbit IgG    |
| GM130             | BD Biosciences | 610822         | Mouse IgG     |
| Lamp1             | PTM BIO        | PTM-5775       | Mouse IgG     |
| Goat IgG          | Beyotime       | A7007          | Goat IgG      |
| Rabbit IgG        | Beyotime       | A7016          | Rabbit IgG    |
| Mouse IgG         | Beyotime       | A7028          | Mouse IgG     |
